1 **FHL-1 interacts with human RPE cells through the  $\alpha 5\beta 1$  integrin and**  
2 **confers protection against oxidative stress**

3

4 **Running title:** FHL-1 protects RPE cells from oxidative stress

5

6 *Rawshan Choudhury<sup>1\*</sup>, Nadhim Bayatti<sup>1\*</sup>, Richard Scharff<sup>1</sup>, Ewa Szula<sup>1</sup>, Viranga Tilakaratna<sup>1</sup>,*  
7 *Maja Søberg Udsen<sup>2</sup>, Selina McHarg<sup>1</sup>, Janet A Askari<sup>3</sup>, Martin J Humphries<sup>3</sup>, Paul N Bishop<sup>1,4</sup>*  
8 *and Simon J Clark<sup>1,5,6,¶</sup>*

9

10 <sup>1</sup>Division of Evolution and Genomic Sciences, School of Biological Sciences, Faculty of  
11 Biology, Medicine and Health, University of Manchester, UK.

12 <sup>2</sup>Panum Institute, Dept. of Immunology and Microbiology, University of Copenhagen,  
13 Denmark.

14 <sup>3</sup>Wellcome Centre for Cell-Matrix Research, Division of Cell Matrix Biology & Regenerative  
15 Medicine, School of Biological Sciences, Faculty of Biology, Medicine and Health,  
16 Manchester Academic Health Sciences Centre, University of Manchester, UK.

17 <sup>4</sup>Manchester Royal Eye Hospital, Manchester University NHS Foundation Trust, Manchester  
18 Academic Health Sciences Centre, Manchester, UK.

19 <sup>5</sup>Lydia Becker Institute of Immunology and Inflammation, Faculty of Biology, Medicine and  
20 Health, University of Manchester, UK.

21 <sup>6</sup>Institute for Ophthalmic Research, Eberhard Karls University of Tübingen, Germany.

22

23 \*These authors contributed equally to the work presented here

24

25

26 ¶Correspondence should be addressed to:

27 Prof. Simon J. Clark

28 Institute for Ophthalmic Research

29 Eberhard Karls University of Tübingen

30 Elfriede-Aulhorn-Straße 7

31 72076 Tübingen, Germany

32 Tel: +49 7071 29 87894

33 Email: [simon.clark@uni-tuebingen.de](mailto:simon.clark@uni-tuebingen.de)

34

35 **Abbreviations**

|    |       |                                    |
|----|-------|------------------------------------|
| 36 | AMD   | Age-related macular degeneration   |
| 37 | CCP   | Complement control protein         |
| 38 | DMEM  | Dulbecco's modified eagle's medium |
| 39 | ECM   | Extracellular matrix               |
| 40 | FCS   | Foetal calf serum                  |
| 41 | FDR   | False discovery rate               |
| 42 | FH    | Factor H                           |
| 43 | FHL-1 | Factor H-like protein 1            |
| 44 | FHR-4 | Factor H-related protein 4         |
| 45 | FI    | Factor I                           |
| 46 | FN    | Fibronectin                        |
| 47 | GAGs  | Glycosaminoglycans                 |
| 48 | LA    | Laminin                            |
| 49 | LAL   | Limulus amoebocyte lysate          |
| 50 | MR    | Mineralocorticoid receptor         |
| 51 | NSR   | Neurosensory retina                |
| 52 | NGS   | Normal goat serum                  |
| 53 | PFA   | Paraformaldehyde                   |
| 54 | RPE   | retinal pigment epithelium         |

55

56

57 **Acknowledgements**

58 We thank Leo Zeef and Andy Hayes of the Bioinformatics and Genomic Technologies Core  
59 Facilities at the University of Manchester for providing support with regard to RNA-seq. This  
60 work was funded by a Fight for Sight research grant (1852/53) and an MRC Career  
61 development Fellowship (MR/K024418/1). SJC is funded by the Helmut Ecker Foundation,  
62 Germany.

63

64 **Conflicts of Interest Statement**

65 PNB, and SJC are inventors of patent applications that describe the use of complement  
66 inhibitors for therapeutic purposes, and are co-founders and Directors of Complement  
67 Therapeutics, which is developing complement inhibitors for therapeutic purposes. RC, NB,  
68 RS, ES, VT, MSU, SM, JAA and MJH all declare that they have no conflicts of interest.

69

70

71 **Author Contributions**

72 RC, NB, PNB and SJC designed research; RC, NB, RS and SJC performed research; ES, VT,  
73 MSU, SM, JAA and MJH contributed new reagents or analytical tools; RC, NB, PNB and SJC  
74 analysed data; RC, NB, PNB and SJC wrote the paper. SJC co-ordinated the project and all  
75 authors contributed to the final version of the manuscript text.

76

77 **Abstract**

78 Retinal pigment epithelial (RPE) cells that underlie the neurosensory retina are essential for  
79 the maintenance of photoreceptor cells and hence vision. Interactions between the RPE and  
80 their basement membrane, *i.e.* the inner layer of Bruch's membrane, are essential for RPE cell  
81 health and function, but the signals induced by Bruch's membrane engagement, and their  
82 contributions to RPE cell fate determination remain poorly defined. Here, we studied the  
83 functional role of the soluble complement regulator and component of Bruch's membrane,  
84 Factor H-like protein 1 (FHL-1). Human primary RPE cells adhered to FHL-1 in a manner that  
85 was eliminated by either mutagenesis of the integrin-binding RGD motif in FHL-1 or by using  
86 competing antibodies directed against the  $\alpha 5$  and  $\beta 1$  integrin subunits. The results obtained  
87 from primary RPE cells were replicated using the hTERT-RPE cell line. RNAseq expression  
88 analysis of hTERT-RPE cells bound to FHL-1 showed an increased expression of the heat-  
89 shock protein genes *HSPA6*, *CRYAB*, *HSPA1A* and *HSPA1B* when compared to cells bound to  
90 fibronectin (FN) or laminin (LA). Pathway analysis implicated changes in EIF2 signalling, the  
91 unfolded protein response, and mineralocorticoid receptor signalling as putative pathways.  
92 Subsequent cell survival assays using H<sub>2</sub>O<sub>2</sub> to induce oxidative stress-induced cell death  
93 showed hTERT-RPE cells had significantly greater protection when bound to FHL-1 or LA  
94 compared to plastic or FN. These data show a non-canonical role of FHL-1 in protecting RPE  
95 cells against oxidative stress and identifies a novel interaction that has implications for ocular  
96 diseases such as age-related macular degeneration.

97

98

99 **Keywords:** Age-related macular degeneration, RPE cells, complement system, FHL-1,  
100 integrins, oxidative stress.

## 101 Introduction

102 The retinal pigment epithelium (RPE), a monolayer of cells in the retina, makes an essential  
103 contribution to the maintenance and support of the photoreceptor cells, and hence vision itself  
104 (1). Disruption to the normal homeostasis of RPE cells is linked to a range of retinal  
105 degenerative diseases including age-related macular degeneration (AMD) (2): the third leading  
106 cause of blindness in the world (3). RPE cells have a high metabolic turnover and are exposed  
107 to extreme levels of light-induced oxidative stress (4). Furthermore, these cells are among the  
108 most actively phagocytic cells in the body where they deal with the constant shedding of the  
109 outer segments of both rod and cone cells, which are dynamic structures that undergo constant  
110 renewal (5). RPE cells also play fundamental roles in the transportation of nutrients from the  
111 underlying blood vasculature (termed the choriocapillaris, see Figure 1a) to photoreceptors,  
112 and *vice versa*, such as the transportation of ions, water and metabolic end-products from the  
113 sub-retinal space to the blood.

114 RPE cells are separated from the choriocapillaris by an acellular barrier called Bruch's  
115 membrane (Figure 1a). This extracellular matrix (ECM) is comprised of five separate layers;  
116 the RPE basement membrane, inner collagenous layer, an elastin core, the outer collagenous  
117 layer, and the choriocapillaris basement membrane (6). The structure and permeability of  
118 Bruch's membrane is important for maintaining a healthy environment in the eye. Bruch's  
119 membrane itself confers some selectivity as to what can, or cannot, pass through from the  
120 choroid to the retinal space (7), leading to two immunologically semi-independent regions.  
121 Indeed, the breakdown of Bruch's membrane barrier function allows the intrusion of blood  
122 vessels into the retinal space and is the site of lipid and debris accumulation that leads to the  
123 formation of drusen, the hallmark lesions of the early stages of AMD (8).

124 The attachment of RPE cells to their underlying Bruch's membrane is required to  
125 maintain their homeostasis, and changes to this ECM affects RPE cell gene transcription and  
126 protein secretion (9). Attachment of the RPE to the inner basement membrane of Bruch's  
127 membrane is mediated at least in part by integrins (Figure 1a). Integrins are heterodimeric  
128 proteins comprising various combinations of  $\alpha$  and  $\beta$  subunits that determine ligand-binding  
129 specificity (10, 11) and control the morphology and fate of the host cell (12). A variety of  
130 integrins are expressed by the RPE (13), including the  $\alpha 5 \beta 1$  integrin (*ITGA5:ITGB1*) which  
131 has been shown to mediate cell attachment, migration and proliferation (14). The  $\alpha 5 \beta 1$  integrin  
132 recognises the conserved binding motif Arg-Gly-Asp (RGD) that is present in various ECM  
133 ligands including fibronectin (FN) (15).

134           Complement factor H-like protein 1 (FHL-1) is a truncated form of the complement  
135 inhibitory protein factor H (FH), which arises from alternative splicing of the *CFH* gene on  
136 chromosome 1 (16, 17). FHL-1, and to a lesser extent FH, have been identified within Bruch's  
137 membrane and at the interface between Bruch's membrane and the RPE (7, 18). Genetic  
138 variants in the *CFH* gene are associated with increased risk of AMD (19, 20) and this is thought  
139 to be due to decreased activity of FHL-1 and FH that results in increased complement activation  
140 in the ECM, leading to a local inflammatory response, the recruitment of circulating immune  
141 cells, formation of drusen, and ultimately RPE cell death (21–23). However, recent studies  
142 have begun to identify non-canonical roles of FH and FHL-1 and the potential contribution of  
143 their dysregulation to AMD pathogenesis through inducing RPE mitochondrial dysfunction  
144 (24, 25) and lipid peroxidation (26). Both FH and FHL-1 have an RGD motif on the surface of  
145 their fourth complement control protein (CCP) domain (see Figure 1b) and it has previously  
146 been demonstrated that FHL-1 can confer cell attachment activity to human epithelial and  
147 fibroblast cell lines *via* this RGD motif (27).

148           Herein, we investigate the interactions between primary human RPE cells, and the  
149 immortalised RPE cell line hTERT-RPE1, with immobilised FHL-1. We investigate the role  
150 of RPE cell integrins in interacting with FHL-1 and, by using RNAseq and cell survival assays,  
151 analyse the downstream consequences of the RPE cell/FHL-1 interaction compared to  
152 basement membrane components including laminin (LA) and FN. Subsequently, we elucidate  
153 a novel role for RPE/FHL-1 interactions in RPE cell modulation and their survival in response  
154 to oxidative stress.

## 155 **Materials and Methods**

### 156 *Primary RPE isolation from human eye-globes:*

157 Human eyes were collected from the Manchester Royal Eye Hospital Eye Bank after removal  
158 of the corneas for transplantation. Consent had been obtained for the eye tissue to be used for  
159 research and guidelines established in the Human Tissue Act of 2004 (UK) were adhered to.  
160 Ethical approval for the use of human donor eyes was given by North West – Greater  
161 Manchester Central Research Ethics Committee (REC reference 15/NW/0932). A total of 22  
162 donor eye pairs were used (13 female, 9 male) with an age-range between 42 and 77 years old  
163 (mean age 58.8 years old). All donors used were <48 hours post mortem. Eye globes were  
164 collected in collection media (Hank's Balanced Salt Solution (Sigma-Aldrich, Poole, UK)  
165 supplemented with 1% (w/v) Amphotericin-B, 1% (w/v) Penicillin/Streptomycin, 0.5% (w/v)  
166 Sodium Pyruvate, 1% (w/v) HEPES, 0.01 mg/ml gentamycin (Sigma-Aldrich). Each eye globe  
167 was placed in a 10 cm petri dish and washed with phosphate-buffered saline (PBS). Then the  
168 iris, lens, vitreous and neurosensory retina (NSR) were gently removed from the posterior eye-  
169 cup using a scalpel, forceps and scissors. After that, the eye cup was rinsed with sterile PBS  
170 and the interior was digested using 0.5 mg/ml each of collagenase Type I-A (from *Clostridium*  
171 *histolyticum*, Sigma-Aldrich) and Type IV (from *Clostridium*, Sigma-Aldrich) in 5 ml of  
172 sterile-filtered Dulbecco's Modified Eagle's Medium (DMEM3, Sigma-Aldrich) media with  
173 high glucose for 90 min at 37°C. Next the media containing the collagenases in the eye cup  
174 was gently discarded, then the eye cup was filled with 5 ml of fresh DMEM media and the RPE  
175 were gently scraped off the underlying Bruch's membrane.

176 The media containing RPE sheets/fragments was collected and centrifuged at 150 g for  
177 5 min. The supernatant was removed and the RPE sheets/fragments were resuspended in 4 ml  
178 RPE media (1:1, DMEM3: Ham's F12 medium (GIBCO 31330-038), 10% (v/v) foetal calf  
179 serum, 1% (w/v) penicillin-streptomycin). Resuspended RPE was added to 0.5% (w/v) gelatin  
180 (Sigma-Aldrich)-PBS coated-wells of 12 or 24 well plates. After 24h, the RPE was washed 3x  
181 with PBS and fresh media was added. RPE cells were grown until they were confluent and  
182 ready to be passaged.

183

### 184 *Clonal cell line tissue culture:*

185 The human immortalized RPE cell line hTERT-RPE (hTERT-RPE-1, ATCC®CRL-400) was  
186 purchased from ATCC (LGC Standards, UK). The hTERT-RPE-1 cells were grown in DMEM:  
187 Ham's F-12 (ATCC, 1:1) media containing 10% (v/v) foetal calf serum (ATCC), 100 U/ml  
188 penicillin and 100 mg/ml streptomycin and 0.01 mg/ml hygromycin B (Sigma-Aldrich).

189 HEK293T cells were grown in DMEM3, containing 10% (v/v) fetal calf serum, 100 U/ml  
190 penicillin and 100 mg/ml streptomycin. All cells were maintained at 37°C in 5% humidified  
191 CO<sub>2</sub>.

192

193 *Transfection of wild-type and RGD-null FHL-1 plasmid into HEK293T:*

194 cDNA encoding histidine-tagged full-length wild-type FHL-1 (18) and the RGD-null FHL-1  
195 protein, where the aspartic acid is substituted with an alanine to disrupt the RGD binding site  
196 was synthesised commercially (Life Technologies, Paisley, UK). Purified cDNA was  
197 incorporated into a pcDNA3.1 vector and transfected into HEK293T cells using PEI max  
198 transfection reagent (Polysciences, Germany) as described previously (18). Briefly, for each  
199 15 cm dish, 1 mg/ml plasmid DNA and 7.5 mM PEI were added to separate aliquots of 150  
200 mM NaCl and each incubated for 10 min at room temperature. After incubation, the PEI  
201 solution was slowly added to the solution containing DNA and then incubated for 10 min at  
202 room temperature. The DNA/PEI mixture was added to a 15 cm diameter dish containing  $7 \times 10^6$   
203 HEK293T cells/per dish in a dropwise manner and incubated at 37°C. After 5-6 hours, the  
204 media was replaced with 2% (v/v) FCS containing DMEM3 (no antibiotic) and incubated at  
205 37°C for overnight. Conditioned media was collected daily and replaced with fresh media over  
206 the next 4 days.

207

208 *Purification of wild-type and RGD-null FHL-1:*

209 Conditioned media from each of the 20 dishes (17.5ml/dish) were collected and pooled after  
210 24, 48, 72, and 144 hours. Total conditioned media after 144 hours (1,400 mls total) was diluted  
211 with the addition of 600 mls 50 mM HEPES, 500 mM NaCl, 20 mM Imidazole, pH 7.5. To  
212 this, 12 ml of NiNTA resin (Expedeon) was added and incubated overnight with rotation at  
213 4°C. The NiNTA beads were collected by passing the media through empty PD10 columns  
214 with a filter (GE Healthcare) by gravity flow (500 ml media per PD10 column, i.e. four PD10  
215 columns in total). The beads were then washed with 10 ml of wash buffer (50 mM HEPES,  
216 500 mM NaCl, 20 mM Imidazole, pH 7.5). Finally, wild-type FHL-1 or RGD-null FHL-1  
217 protein was eluted using 16 ml of elution buffer (50 mM HEPES, 500 mM NaCl, 500 mM  
218 imidazole, pH 7.5). Eluted protein was dialysed back into wash buffer overnight at 4°C before  
219 being concentrated further by addition to 1.5ml NiNTA beads and eluted in 6 x 1ml aliquots.  
220 Purified protein aliquots were dialysed into 20 mM glycine, 125 mM NaCl, pH 9.0 using a  
221 dialysis cassette Slide-A-Lyzer (Fisher, cat no 10759784) with a 10 kDa cut off. The purified  
222 recombinant proteins (i.e. FHL-1 and RGD-null FHL-1) were assessed for purity by SDS-



223 PAGE, and visualised by staining the gels for 60min at room temperature with Instant Blue  
224 Coomassie stain (Expedeon, Cambridge, UK).

225

#### 226 *Endotoxin testing of purified FHL-1 proteins*

227 The endotoxin level of FHL-1 recombinant protein preparations was measured using the Toxin  
228 Sensor™ Chromogenic LAL Endotoxin Assay Kit (GenScript, NJ, USA), according to the  
229 manufacturer's protocol. This method utilizes a modified Limulus Amebocyte Lysate (LAL)  
230 and a synthetic colour producing substrate to detect endotoxin chromogenically. Briefly, 100  
231 µl of standards (0, 0.01, 0.025, 0.05, 0.1 and 0.5 EU/ml), test samples (recombinant wild-type  
232 FHL-1 and RGD-null FHL-1 proteins) and a blank containing 100 µl of LAL reagent water  
233 were dispensed into endotoxin-free vials in duplicate. 100 µl of reconstituted LAL was added  
234 to each vial, mixed by swirling and incubated at 37°C in a water bath. After incubation, 100 µl  
235 of reconstituted chromogenic substrate solution was added to each vial and mixed gently to  
236 avoid foaming. All the vials were further incubated at 37°C for 6 minutes. Finally, 500 µl of  
237 each of three colour stabilisers were added eventually to each vial and mixed gently to stop the  
238 reaction. The absorbance of each reaction vial was read at 545 nm.

239 Under the standard conditions, the absorbance at 545 nm shows a linear relationship  
240 within a concentration in the range of 0.01 to 1 EU/ml. The absorbance for the five standards  
241 was plotted on the x-axis and the corresponding endotoxin concentration in EU/ml on the y-  
242 axis. A best-fit straight line was drawn between these points and the endotoxin concentrations  
243 of samples were determined graphically.

244

#### 245 *Fluid-phase cofactor activity of wild-type and RGD-null FHL-1 (C3b break-down assay):*

246 To test the functional capacity of both FHL-1 and RGD-null FHL-1, a C3b breakdown assay  
247 was employed as described previously (23). Briefly, 0.1 µg of either wild-type FHL-1 or RGD-  
248 null FHL-1 was incubated with 2 µg C3b (VWR International, Lutterworth, UK), and 0.4 µg  
249 factor I (FI) (VWR International,) in PBS (total volume of 20 µl) for 15 minutes at 37°C. The  
250 reaction was stopped by the addition of 5 µl 5x SDS reducing sample buffer (NuPAGE LDS  
251 sample buffer, Life Technologies) and boiling for 10 minutes at 100°C. Samples were run on  
252 a 4-12% NuPAGE Bis Tris gels (Life Technologies, UK) at 150V for 75 minutes to allow the  
253 separation of the C3b breakdown product bands. Blue Protein Standard Broad Range (New  
254 England Biolabs, Hitchin, UK) was used as a protein marker. The gels were stained using  
255 Instant Blue for 1 hour at room temperature. Gel images were taken using an Alpha Innotech  
256 FluorChem 5500 gel imaging system.

257 *Immunofluorescence staining:*

258 Primary RPE cells were seeded on coverslips and grown until they were confluent. Cells were  
259 fixed in 4% (w/v) paraformaldehyde (PFA) for 20 min at 4°C. PFA was removed and the  
260 coverslips washed with PBS. Cells were permeabilised with 0.5% (v/v) Triton X-100 in PBS  
261 for 10 min at room temperature. After washing with PBS, the seeded coverslips were blocked  
262 with 5% (v/v) normal goat serum (NGS) for 1h at room temperature. These were then washed  
263 three times with PBS and labelled with antibodies directed against RPE cell markers including  
264 mouse monoclonal anti-RPE65 (Abcam, clone: 401.8B11.3D9) and anti-bestrophin-1 (Novus  
265 Biologicals, UK, clone: IgG1 E6-6), or the tight-junction marker anti-ZO-1 (Invitrogen, clone:  
266 ZO-1-IA1Z). All antibodies were diluted 1:50 in PBS containing 5% (v/v) normal goat serum  
267 (NGS; 100 µl/coverslip) (Novus Biologicals, UK) and incubated overnight at 4°C. Cells were  
268 washed with PBS and then incubated with secondary antibody Alexa Fluor 488-conjugated  
269 goat anti-mouse antibody (Life Technologies) diluted at 1:100 in 5% (v/v) NGS in PBS for 1  
270 hour at room temperature. Finally, DAPI was applied as a nuclear counter stain at 0.3 µM for  
271 5 minutes prior to mounting with medium (Vectashield soft, Vector Labs, Peterborough, UK)  
272 and placing the coverslips upside down onto microscope slides. Images were taken using by a  
273 snapshot widefield microscope (Leica, 20x/0.50 PL FLUVOTAR objective) using HCIImage  
274 software.

275

276 *Cell spreading assay:*

277 For the cell spreading assays, 96-well plates were coated with different protein ligands (50 to  
278 80 µg of FHL-1, FH (HyCult, Uden, The Netherlands), FHR-4 (23) and 10 µg of FN (Sigma-  
279 Aldrich, cat F1141) and BSA) in PBS (with Ca<sup>2+</sup> and Mg<sup>2+</sup>, Sigma-Aldrich) and incubated  
280 overnight at 4°C. Then all of the coated wells were blocked with heat denatured 1% BSA in  
281 PBS (heated for 11 min at 85°C to denature the BSA) for one hour at room temperature.  
282 Primary RPE or hTERT-RPE-1 cells were trypsinized, counted using haemocytometer and  
283 10,000 cells per well added for each condition in duplicate or in triplicate, prior to incubating  
284 for 3 hours at 37°C. The cells were photographed every hour (Leica microscope, 10x/0.22 HI  
285 PLAN objective and DFC420 camera) with at least four images being taken for each well;  
286 these images were analysed using Leica imaging software and ImageJ to assess the degree of  
287 spreading. Cells were defined as spread if they were phase dark and exhibited visible cytoplasm  
288 all around the nucleus.

289

290

291 *Inhibition and Competition assay*

292 96-well plates were coated with different protein ligands (80 µg FHL-1, FH, FHR-4 and 10 µg  
293 of FN and BSA) in PBS (with Ca<sup>2+</sup> and Mg<sup>2+</sup>, Sigma-Aldrich) and incubated overnight at 4°C.  
294 Then all coated wells were blocked with heat denatured 1% (w/v) BSA in PBS for one hour at  
295 room temperature. Primary RPE and hTERT-RPE-1 cells were trypsinized and counted using  
296 a haemocytometer. Cells (in each condition 10,000 cells/well in triplicate) were incubated with  
297 10 µg/ml of mouse monoclonal anti-α5 (mAb16), anti-β1 (mAb 13), anti-αV (17e6), anti-αVβ3  
298 (LM609) or anti-αVβ5 (PIF6) integrin antibodies (all kindly supplied by the Prof. Humphries  
299 lab), for 20 min at room temperature before adding to the wells and incubated for 3 hours at  
300 37°C.

301 In other inhibition assays, cells were incubated with increasing concentrations (0 to 120  
302 µg/ml) of a reverse sequence control peptide (Ser-Asp-Gly-Arg-Gly/SDGRG, Sigma-Aldrich)  
303 and an RGD peptide (Gly-Arg-Gly-Asp-Ser/GRGDS, Sigma-Aldrich) for 20 min at room  
304 temperature before the cells were added to the wells for incubation for 3 hours at 37°C.

305 In competition assays, either primary RPE or immortalized hTERT-RPE-1 cells were  
306 pre-incubated with different proteins such as FHL-1 (50 µg/ml), CCP6-7 of FHL-1 (28) at 50  
307 µg/ml, FH (150 µg/ml) and FN (10 µg/ml) for 20 min at room temperature before being added  
308 to FHL-1 (50 µg/ml) coated plates. Cells were incubated at 37°C for up to 3 hours.

309

310 *RNA isolations and quantitative RT-PCR (qPCR):*

311 The hTERT-RPE-1 cells (1x 10<sup>5</sup> cells per well) were grown on either 50 µg/ml FHL-1, 10  
312 µg/ml FN or 10 µg/ml LA (Merck Millipore, cat. No. CC095) substrate in a 24-well plate for  
313 24 hours at 37°C. For gene expression analysis, total RNA was extracted from the attached  
314 cells using an RNA Isolate II Mini Kit (BioLine) according to the manufacturer's protocol.  
315 RNA quality and concentration were measured with a NanoDrop 2000 spectrophotometer  
316 (ThermoFisher Scientific). cDNA was synthesized using 1 µg of RNA and a High Capacity  
317 cDNA Reverse Transcription kit (Applied Biosystems) according to the manufacturer's  
318 instructions. PCR was carried out using TaqMan® Gene Expression Assays (FAM/MGB-NFQ,  
319 ThermoFisher Scientific, Paisley, UK) and real time PCR (qPCR StepOne Plus, ThermoFisher)  
320 cyclers. PCR reactions were carried out on 96-well plates (MicroAmp®Fast Optical 96-well  
321 Reaction plate, Applied Biosystems, Life Technologies) and 2 µl cDNA (10-20 ng diluted in  
322 nuclease-free water) was added to each well in triplicate.

323

324

325 *Gene Transcriptomic analysis by RNA-seq:*

326 For RNA-seq, hTERT-RPE1 cells were grown to 80% confluency on either FHL1 (20µg/ml),  
327 FN or LA (10µg/ml). For each analysis 2 wells of a six-well plate were used and 3 replicates  
328 were performed (n = 9 in total). After media was fully aspirated from the wells, total RNA was  
329 isolated using an Isolate II RNA Mini Kit (Biolone) directly from the wells as per  
330 manufacturer's instructions, and RNA quality and concentration measured using a Nanodrop  
331 2000 spectrophotometer. Unmapped paired-end sequences from an Illumina HiSeq4000  
332 sequencer were tested by FastQC  
333 (<http://www.bioinformatics.babraham.ac.uk/projects/fastqc/>). Sequence adapters were  
334 removed and reads were quality trimmed using Trimmomatic\_0.36 (29). The reads were  
335 mapped against the reference human genome (hg38) and counts per gene were calculated using  
336 annotation from GENCODE 27 (<http://www.gencodegenes.org/>) using STAR\_2.5.3 (30).  
337 Normalisation, Principal Component Analysis, and differential expression were calculated  
338 with DESeq2\_1.16.1 (31). Differential transcriptional analysis was carried out using Ingenuity  
339 Pathway Analysis (Qiagen) comparing differences between substrates in a core analysis with  
340 a global false discovery rate (FDR) of 0.1. Analysis was also carried out using DAVID  
341 (<https://david.ncifcrf.gov/>) with a fold change cut-off of 1.5 when comparing between gene  
342 expression between substrates, transcripts with counts <50 were defined as being absent.

343

344 *Cell Survival Assay:*

345 hTERT-RPE1 cells were maintained in DMEM:F12 (1:1) media supplemented with 10% (v/v)  
346 FCS, 1% (w/v) penicillin-streptomycin and 0.01 mg/ml hygromycin B (all from Thermo Fisher  
347 Scientific UK). For experiments, cells were plated at a density of 100,000cm<sup>-2</sup> in 96 well plates  
348 (Corning, MERCK UK), with wells previously coated for 24h with 20µg/ml FHL-1, 20µg/ml  
349 RGD null FHL-1, 10µg/ml FN (Sigma-Aldrich), 10µg/ml LA (Sigma-Aldrich) or 1x PBS with  
350 added Ca<sup>2+</sup> and Mg<sup>2+</sup> (ThermoFisher Scientific UK) vehicle. After a further 24h cells were  
351 switched to serum-free DMEM:F12 (1:1) medium supplemented with B27 without  
352 antioxidants (Thermo Fisher Scientific, UK). Cells from each group of coated wells were  
353 incubated in the above media in the presence or absence of 150µM H<sub>2</sub>O<sub>2</sub> (Sigma-Aldrich) for  
354 a further 24h. Cells were then fixed in 4% paraformaldehyde (Sigma-Aldrich) in 1x PBS for  
355 15mins at RT and washed three times in PBS. During the second wash, 1µg/ml Hoechst 33342  
356 (Sigma-Aldrich) added to the PBS wash to stain nuclei. Cells were imaged using a CellInsight  
357 CX5 scanner (Thermo Fisher Scientific) with a 10x objective, taking three snapshots per well  
358 in identical positions, and three wells for each condition per experiment for three experiments.

359 Cell counting was carried using the ImageJ software package. After thresholding to create a  
360 binary image, cell nuclei sized between 0-150 pixel<sup>2</sup> were included in counts. Numbers using  
361 these settings were consistent with manual counting from images from PBS control and PBS  
362 H<sub>2</sub>O<sub>2</sub>-stimulated cells.

363

364

## 365 **Results**

### 366 *Primary human RPE cells interact with immobilised FHL-1*

367 To investigate potential interactions between RPE cells and FHL-1, primary RPE cells were  
368 isolated from human donor cadaver eyes. Cells were examined for RPE marker expression by  
369 immunofluorescence, including ZO-1, RPE-65 and bestrophin-1 (Supplementary Figure 1).  
370 Cell spreading assays were used to determine whether the primary RPE cells interact with FHL-  
371 1 immobilised onto a plastic surface. RPE cells were added to plates pre-treated with  
372 immobilised full-length FH or FHL-1 together with a FN positive control, and BSA and FHR-  
373 4 (a structurally related protein, but with no native RGD integrin binding motif) as negative  
374 controls. After three hours incubation, 40% primary RPE cell spreading was observed on FHL-  
375 1 compared to the FN control (Figure 2). In contrast, primary RPE cells did not spread on  
376 immobilised full-length FH, despite it sharing an identical RGD binding site with FHL-1.  
377 Furthermore, no primary RPE cell spreading was visible on either plastic alone, BSA or FHR-  
378 4 (Figure 2). To investigate further the lack of interaction with FH, cell spreading experiments  
379 were repeated in the presence of FH as a fluid phase competitor (see Supplementary Figure 2).  
380 Additionally, FHL-1, FN and a recombinant protein comprising solely CCPs6-7 of FH were  
381 also used as fluid phase competitors. Fluid-phase FH inhibited the spreading of primary RPE  
382 cells on immobilised FHL-1, as well as fluid phase FHL-1 and FN (Supplementary Figure 2).  
383 This suggests that the previously observed lack of RPE cell interaction with immobilised FH  
384 was due to the way the protein was absorbed onto plastic, and subsequent inaccessibility of its  
385 RGD domain, rather than an inherent lack of functional activity.

386

### 387 *RPE cell $\alpha 5\beta 1$ integrin interacts with FHL-1 via its RGD site*

388 Given the presence of an RGD motif in CCP4 of FHL-1 (Figure 1b), we tested the role of  
389 integrins in FHL-1 binding. Competition assays were performed where primary RPE cells were  
390 bound to immobilised FHL-1 in the presence of inhibitory antibodies against integrins known  
391 to bind the RGD sequence including anti- $\alpha 5$  (mAb16), anti- $\beta 1$  (mAb13), anti- $\alpha V$  (17e6), anti-  
392  $\alpha V\beta 3$  and anti- $\alpha V\beta 5$  (Figure 3). The spreading of primary RPE cells on immobilised FHL-1  
393 was completely abolished in the presence of either anti- $\alpha 5$  or anti- $\beta 1$  antibodies in a dose-  
394 dependent manner (Figure 3g-i). In addition, a significant reduction in RPE cell spreading was  
395 also achieved with the anti- $\alpha V\beta 5$  antibody too, suggesting dual receptor recognition (Figure  
396 3g).

397 In additional competition experiments, a cyclic GRGDS peptide decreased the  
398 percentage of spread RPE cells on FHL-1 compared to a reverse-sequence control peptide

399 (SDGRG) (Figure 4a-b). To confirm the role of the RGD domain in FHL-1 as an integrin  
400 binding site an FHL-1 RGD ‘null’ protein was made, where the aspartate residue in the RGD  
401 sequence was mutated to an alanine residue (making an RGA sequence, see Figure 4a). The  
402 FHL-1-RGD null protein retained its functional co-factor activity for the complement factor I  
403 (FI) mediated breakdown of C3b into iC3b (see Supplementary Figure 3), but lost all capacity  
404 to support primary RPE cell spreading (Figure 4c-g). This lack of interaction was not due to  
405 the presence of any endotoxin contamination within the recombinant protein preparations as  
406 the measured endotoxin levels for FHL-1 and FHL-1 RGD null were 0.02 ng/ml and 0.03  
407 ng/ml, respectively.

408

#### 409 *The hTERT-RPE1 cell line mimics primary RPE cell behaviour*

410 Next, we investigated the effects on gene transcription of the integrin/FHL-1 interaction, but  
411 surmised that this would be challenging using primary cells due to the naturally occurring  
412 donor-to-donor variability. Therefore, we tested the suitability of the RPE cell line hTERT-  
413 RPE1 for use in further experiments. Cell spreading assays were repeated as before and  
414 approximately 70% cell spreading was demonstrated on immobilised FHL-1 with hTERT-RPE  
415 cells when compared to FN (Figure 5). No cell spreading was observed on the FHL-1 RGD  
416 null mutant control, confirming that the interaction was RGD-binding integrin mediated.

417

#### 418 *Substrate-dependent alteration of gene expression in hTERT-RPE1 cells*

419 In order to investigate the effects of different substrates on gene expression RNA-seq  
420 transcriptome analysis was carried out on hTERT-RPE1 cells grown for 24h on three different  
421 substrates; FHL-1, FN and LA. Data were analysed using Ingenuity Pathway Analysis (IPA;  
422 Qiagen) software comparing differences between substrate in a core analysis with a false  
423 discovery rate (FDR) of 0.1. A further analysis was carried out using DAVID  
424 (<https://david.ncifcrf.gov/>): see Supplementary Tables 1-3.

425 For functional annotation clustering in DAVID analysis, gene lists were constructed  
426 comparing differential gene expression in cells between the different substrates: FHL-1 v FN  
427 (201 differentially expressed genes), FHL-1v LA (139 genes) and LA v FN (162 genes), see  
428 Supplementary Tables 1-3. Functional annotation clustering, Supplementary Tables 4-6,  
429 revealed that the majority of changes when comparing FHL-1 and FN concerned cell cycle and  
430 DNA replication, while in the case of comparing FHL-1 and LA, the highest enrichment  
431 occurred in the immune response and cytokine activity.

432 IPA analysis also revealed similar differences in canonical pathways predicted to be  
433 altered when comparing between substrates (Figure 6: all significantly altered pathways of  
434 interest are found in Supplementary Tables 7-9). In the case of FHL-1 v FN, the majority of  
435 genes in the top 20 predicted pathways were found to be downregulated by FHL-1 especially  
436 those involved in the cell cycle and/or DNA repair, e.g. cell cycle control of chromosomal  
437 replication, mitotic roles of polo-like kinase, cell cycle G2/M DNA damage checkpoint  
438 regulation, telomere extension by telomerase, and role of CHK proteins in cell cycle checkpoint  
439 control. When comparing FHL-1 v LA, the majority of genes were upregulated by FHL-1 in  
440 predicted pathways, these included cell/cell interaction pathways such as axonal guidance, and  
441 integrin signalling. There were no differences observed in integrin signalling when comparing  
442 FHL-1 v FN, suggesting these two substrates regulate similar genes in that pathway. Additional  
443 pathways predicted to be altered in FHL-1 v LA included intracellular cell signalling pathways,  
444 e.g. EIF2 signalling, mTOR signalling, nuclear receptor signalling pathways (glucocorticoid  
445 and aldosterone), Rho signalling pathways (RhoA, RhoGDI and actin-based motility by Rho).  
446 The NRF2-mediated oxidative stress response was also altered, suggesting that FHL-1 may  
447 exert anti-oxidant effects. A number of these pathways were commonly regulated in FHL-1 v  
448 FN and FHL-1 v LA but not in LA v FN, and therefore are likely to be specific to FHL-1, i.e.  
449 unfolded protein response, aldosterone signalling in epithelial cells, and EIF2 signalling.  
450 Taking these data together, FHL-1 predominantly inhibits expression of genes controlling the  
451 cell cycle compared to FN and exhibits differences in cell/cell interaction mechanisms when  
452 compared to the effects of LA.

453

#### 454 *FHL-1 protects hTERT-RPE1 cells from oxidative stress induced cell death*

455 As FHL-1 modifies oxidative stress gene expression, and the unfolded protein response via  
456 heat shock protein gene expression (including the *HSPA6* gene), we investigated the putative  
457 protective response of FHL-1 to oxidative stress-induced cell death. To this end, cell survival  
458 assays were performed on hTERT-RPE1 cells grown in wells pre-coated with FHL-1, RGD-  
459 null, FN, LA and PBS control for 24 hours at concentrations similar to those used for the cell  
460 spreading assays. After switching to serum-free medium supplemented with B27 without  
461 antioxidants, cells were maintained with H<sub>2</sub>O<sub>2</sub> (150µM) for a further 24h. After this, cells were  
462 stained with Hoechst 33342 and imaged using an automated scanner and counted using ImageJ.  
463 H<sub>2</sub>O<sub>2</sub> treatment resulted in robust cell death in control cells (PBS coated wells) compared to  
464 untreated cells (Figure 7). The number of cells in untreated wells were not significantly  
465 different when comparing different substrates. However, cells grown on FHL-1 and LA were



466 significantly protected ( $p < 0.01$  and  $p < 0.02$  respectively) against  $H_2O_2$ -mediated cell death  
467 compared to FN which exhibited no such protection. FHL-1 RGD-null did not show a  
468 significant protective effect. These data identify a role of FHL-1 in mediating RPE cell survival  
469 against oxidative stress similar to that conferred by LA binding.

470

471

## 472 Discussion

473 Here, we describe a novel interaction between human RPE cells and a protein associated with  
474 Bruch's membrane, the complement regulator FHL-1 (7, 18). Despite the previously known  
475 important complement regulatory functions of FHL-1, the interaction described in this study  
476 demonstrates a non-canonical role of FHL-1 in protecting RPE cells from oxidative stressed-  
477 induced cell death. The human retina is one of the most metabolically active sites within the  
478 human body and the RPE cells are particularly subject to extensive levels of oxidative stress.  
479 There is strong evidence implicating oxidative stress in the pathogenesis of AMD (32–34), and  
480 the stability of RPE cells *in vivo* is dependent on their interactions, not only with one another,  
481 but also their underlying ECM, Bruch's membrane.

482 RPE cell attachment to ECM components through integrins is a well-documented  
483 phenomenon (13, 14), and increasing RPE cell integrin expression has been postulated as a  
484 method for improving the adhesion of transplanted RPE cells to a recipient's Bruch's  
485 membrane (35). Furthermore, integrin-mediated RPE adhesion to Bruch's membrane confers  
486 protective effects (36, 37). Previous work investigating these interactions has focused on the  
487 main ligands of integrin receptors within Bruch's membrane; collagen, LA, and FN (6). By  
488 using cultured primary RPE cells, isolated from human donor eyes, we demonstrate their ability  
489 to interact with immobilised FHL-1 (see Figure 2). Given that FHL-1 is identical to the first  
490 seven domains of FH (plus a unique four amino acid C-terminal tail: see Figure 1b), and both  
491 have exactly the same RGD-containing CCP4 (16, 17), it was of interest that RPE cells spread  
492 on immobilised FHL-1 but not FH. This phenomenon has been observed previously where a  
493 series of anchorage-dependent cell lines were shown to adhere to FHL-1, but not FH (27). This  
494 study, which used recombinant fragments of the FHL-1 protein, identified the RGD binding  
495 domain of FHL-1 as being essential for these interactions. Furthermore, without direct testing  
496 the authors hypothesised that integrins were responsible given the reliance on bivalent metal  
497 ions for the interactions to be successful. Interestingly, they also observed ~50% cell spreading  
498 on FHL-1 when compared to FN, where in our study we observed ~40% with cultured primary  
499 RPE cells and ~70% with the hTERT-RPE cell line (Figures 2 and 5). However, our subsequent  
500 competition of RPE cell/FHL-1 interactions with FH in the fluid phase (Supplementary Figure  
501 2) suggests that the lack of RPE cell interaction with immobilised FH is a result of how the  
502 protein adheres to plastic in our experimental settings rather than necessarily a representation  
503 of its lack of RPE cell adhesion *in vivo*. The predominance of FHL-1, rather than FH, within  
504 Bruch's membrane (18) may indicate that the RPE/ FHL-1 interaction is more important for

505 oxidative stress induced gene expression, although this does not exclude a lesser involvement  
506 of FH in RPE cell resilience to oxidative stress.

507 Evidence of complement over-activation in the ECM of the choriocapillaris in AMD,  
508 and indeed preceding clinical manifestation of the disease, suggests complement gene variants  
509 that confer AMD-risk cause this dysregulation (38–42). In addition, focus has recently been  
510 given to the non-canonical roles of complement proteins in AMD pathogenesis. For example,  
511 the common high-risk Y402H polymorphism in FH has been associated with lipoprotein  
512 dysregulation and causing an ocular phenotype in aged mice (26). Also, the Y402H  
513 polymorphism hinders the ability of FHL-1 to bind glycosaminoglycans (GAGs), such as  
514 heparan sulphate (18, 43–45), although the presence of a secondary GAG-binding site in the  
515 full-length protein means FH itself is not affected (46). The age-associated reduction in heparan  
516 sulphate chains in Bruch’s membrane (47), coupled with the Y402H predisposition to weaker  
517 binding, means less FHL-1 will be present in Bruch’s membrane to regulate local C3b  
518 deposition and complement activation. This study suggests that the decrease in ECM bound  
519 FHL-1 would also result in less RPE cell interactions with FHL-1 and consequently increase  
520 their susceptibility to oxidative stress.

521 We investigated the effects of different immobilised integrin ligands on hTERT-RPE  
522 cell gene transcription using FHL-1, FN and LA substrates. FN binds to similar integrins as  
523 FHL-1 (*ITGA5:ITGB1*) while LA does not. RNAseq, Ingenuity Pathway Analysis, as well as  
524 functional annotation clustering using DAVID, uncovered altered activity in pathways that  
525 were specific to FHL-1 when compared to either FN or LA. Compared to FN (which was not  
526 protective in the cell survival assays), cells grown on FHL-1 exhibited changes in genes  
527 associated with the cell cycle, including: Cell Cycle Control of Chromosomal Replication,  
528 Mitotic Roles of Polo-Like Kinase, Cell Cycle: G2/M DNA Damage Checkpoint Regulation  
529 and Role of CHK Proteins in Cell Cycle Checkpoint Control (see Supplementary Table 7). The  
530 majority of genes in these pathways were down-regulated, but any putative effect on cell cycle  
531 by FHL-1 is likely to be subtle, as there were no differences in cell numbers when comparing  
532 hTERT-RPE cells on FHL-1 and FN in the cell survival assays (when not treated with hydrogen  
533 peroxide) (Figure 7). Although there have been no previous studies on the role of FHL-1 on  
534 cell cycle control, mice deficient of full-length FH (also not expressing FHL-1) exhibit changes  
535 in the number of cells in the developing retina (25). These *Cfh*<sup>-/-</sup> animals displayed reductions  
536 in the rate of mitosis during a critical period of retinal development directly after birth. It is  
537 interesting to note that this study also observed enlarged mitochondria, observations consistent  
538 with premature ATP decline, degeneration and/or senescence. Ingenuity Pathway Analysis also

539 identified changes in metabolic pathways involved in ATP production such as oxidative  
540 phosphorylation and glycolysis as well as mitochondrial dysfunction and sirtuin signalling,  
541 which is responsible for aging/senescence processes within the cell (48). In relation to AMD,  
542 mitochondrial dysfunction and DNA damage occurs in the disease-associated Y402H variant  
543 of FH (49) and this is presumed to be due to the increase in formation radical oxygen species  
544 and subsequent oxidative stress.

545 Compared to hTERT-RPE cells grown on LA, the cells grown on FHL-1 exhibited  
546 altered expression in a number of pathways that were different to those observed when  
547 comparisons were made to FN. Interestingly, integrin signalling was one such pathway, and a  
548 component of that pathway, ITGA5 was found to be a significantly differentially expressed.  
549 FHL-1 and FN both bind to ITGA5:ITGB1. Therefore, it was interesting to observe when  
550 comparing gene expression changes in cells grown in LA with those grown on FN, the integrin  
551 pathway signalling was found to be an affected pathway, highlighting that FHL-1 and FN share  
552 common mechanisms in regulating integrin signalling. FHL-1 v LA-specific changes included  
553 mTOR Signalling, a pathway important in maintaining retinal homeostasis in RPE cells by  
554 regulating lysosomal phagocytosis and autophagy (50), and NRF2-mediated Oxidative Stress  
555 Response that may confer protection to oxidative insults (51). Studies have previously linked  
556 abnormal autophagy with reduced NRF2 signalling in animal models of AMD (52).

557 HSPA6, which is an inducible form of HSP70, was found to be the highest upregulated  
558 gene when cells were grown on immobilised FHL-1 when compared to either FN or LA.  
559 HSP6A which is only partially conserved in the mammalian lineage and has no homologs in  
560 rodents has been reported to be induced in an *in vitro* model of photocoagulation in the ARPE-  
561 19 cell line (53). HSPA6 and another inducible HSP70 gene, HSP1A, which was also  
562 demonstrated to have increased expression in cells grown on FHL-1, work in tandem to protect  
563 cells against proteotoxic insults and heat shock-mediated cell death in various cell lines (54,  
564 55). HSP70 proteins are also known to interact with mineralocorticoid receptor (MR), a high  
565 affinity ligand of aldosterone, and keep it in a basal state (56). In this non-activated state, MR  
566 is predominantly cytoplasmic and part of a large heteromeric complex interacting with a  
567 number of proteins including HSPs. Upon ligand binding, a conformational change occurs that  
568 leads to the dissociation of the complex and subsequently the MR translocates to the nucleus  
569 binding to DNA leading to the regulation of gene transcription. Aldosterone binding and  
570 activation of MR signalling pathways are associated with increased levels in oxidative stress  
571 in vascular inflammation (57) and this is relevant to certain retinal disorders. Use of the MR  
572 antagonist spironolactone, reduces CNV activity in patients with refractory neovascular AMD

573 in a VEGF-independent manner (58). Therefore, an increase in the level of heat shock proteins  
574 (and thus increased sequestration of MR to the cytoplasm) is one potential mechanism by which  
575 FHL-1 may illicit a protective response to RPE cells from oxidative insult.

576         These findings point to a putative role of FHL-1 in mediating a response to oxidative  
577 stress. Therefore, we tested the effect conferred by FHL-1 with RPE cell survival in a hydrogen  
578 peroxide-induced oxidative stress model. While immobilised FHL-1 exhibited protective  
579 effects similar to that observed with immobilised LA, cells grown on FN did not survive to the  
580 same extent (Figure 7). This indicates that any mechanism of FHL-1 mediated protection  
581 occurs independently of any interaction with the integrin signalling pathway shared with FN.  
582 The protective effect is not due to changes in cell cycle, as the number of cells that grew on  
583 immobilised FHL-1 (and untreated with hydrogen peroxide) were similar to those of untreated  
584 cells grown directly on plastic. No previous studies have demonstrated that FHL-1 can confer  
585 a protective effect against oxidative stress; however, a recent study has shown that full length  
586 FH, when supplemented to the cell culture medium can protect ARPE-19 and human iPSC-  
587 derived RPE cells from oxidative insult as a result of 4-HNE treatment (59). Furthermore,  
588 Borrás *et al.* found that FH inhibits caspase-induced apoptosis and protects RPE tight junctions  
589 from oxidative stress-induced disruption (59). However, the Borrás *et al.* study did not identify  
590 how the full-length protein was interacting with the RPE cells to confer these effects as  
591 recombinant truncated fragments of FH all failed to replicate the results seen with the full-  
592 length protein.

593         Our study has been the first to demonstrate a role of FHL-1 in providing RPE cell  
594 resistance to oxidative stress, and highlights the need to fully understand how RPE cells interact  
595 with their underlying ECM. Here we show that FHL-1 alters the gene transcription of RPE  
596 cells by binding to their  $\alpha 5\beta 1$  integrin receptor. This adds a novel function to the repertoire of  
597 FHL-1 by mediating both a complement response as a co-factor for FI in this micro-  
598 environment, but also confer a protective effect against oxidative insults on the RPE cells. This  
599 novel finding will help in our understanding of RPE cell behaviour *in vivo*, and highlights the  
600 need to consider the endogenous RPE cell/ECM interactions when designing therapeutic  
601 interventions.

602

603 **References**

- 604 1. Strauss, O. (2005) The retinal pigment epithelium in visual function. *Physiol. Rev.* **85**,  
605 845–881
- 606 2. Handa, J. T., Bowes Rickman, C., Dick, A. D., Gorin, M. B., Miller, J. W., Toth, C.  
607 A., Ueffing, M., Zarbin, M., and Farrer, L. A. (2019) A systems biology approach  
608 towards understanding and treating non-neovascular age-related macular degeneration.  
609 *Nat. Commun.* **10**, 3347
- 610 3. Wong, W. L., Su, X., Li, X., Cheung, C. M. G., Klein, R., Cheng, C. Y., and Wong, T.  
611 Y. (2014) Global prevalence of age-related macular degeneration and disease burden  
612 projection for 2020 and 2040: A systematic review and meta-analysis. *Lancet Glob.*  
613 *Heal.* **2**, e106-16
- 614 4. Beatty, S., Koh, H. H., Phil, M., Henson, D., and Boulton, M. (2000) The role of  
615 oxidative stress in the pathogenesis of age-related macular degeneration. *Surv.*  
616 *Ophthalmol.* **45**, 115–134
- 617 5. Mazzoni, F., Safa, H., and Finnemann, S. C. (2014) Understanding photoreceptor outer  
618 segment phagocytosis: Use and utility of RPE cells in culture. *Exp. Eye Res.* **126**, 51–  
619 60
- 620 6. Curcio, C. A. and Johnson, M. (2013) Structure, Function, and Pathology of Bruch’s  
621 Membrane. In *Retina* pp. 465–481, Elsevier
- 622 7. Clark, S. J., McHarg, S., Tilakaratna, V., Brace, N., and Bishop, P. N. (2017) Bruch’s  
623 membrane compartmentalizes complement regulation in the eye with implications for  
624 therapeutic design in age-related macular degeneration. *Front. Immunol.* **8**, 1778
- 625 8. Clark, S. J. and Johnson, L. V. (2017) Secondary Photoreceptor Degenerations: Age-  
626 Related Macular Degeneration. *Ref. Modul. Neurosci. Biobehav. Psychol.*
- 627 9. Fernandez-Godino, R., Bujakowska, K. M., and Pierce, E. A. (2018) Changes in  
628 extracellular matrix cause RPE cells to make basal deposits and activate the alternative  
629 complement pathway. *Hum. Mol. Genet.* **27**, 147–159
- 630 10. Michael, M. and Parsons, M. (2020) New perspectives on integrin-dependent  
631 adhesions. *Curr. Opin. Cell Biol.* **63**, 31–37
- 632 11. Horton, E. R., Humphries, J. D., James, J., Jones, M. C., Askari, J. A., and Humphries,  
633 M. J. (2016) The integrin adhesome network at a glance. *J. Cell Sci.* **129**, 4159–4163
- 634 12. Randles, M. J., Lausecker, F., Humphries, J. D., Byron, A., Clark, S. J., Miner, J. H.,  
635 Zent, R., Humphries, M. J., and Lennon, R. (2020) Basement membrane ligands  
636 initiate distinct signalling networks to direct cell shape. *Matrix Biol.*

- 637 13. Zarbin, M. A. (2003) Analysis of retinal pigment epithelium integrin expression and  
638 adhesion to aged submacular human Bruch's membrane.
- 639 14. Li, R., Maminishkis, A., Zahn, G., Vossmeier, D., and Miller, S. S. (2009) Integrin  
640  $\alpha 5\beta 1$  mediates attachment, migration, and proliferation in human retinal pigment  
641 epithelium: Relevance for proliferative retinal disease. *Investig. Ophthalmol. Vis. Sci.*  
642 **50**, 5988–5996
- 643 15. Hynes, R. O. (2002) Integrins: Bidirectional, allosteric signaling machines. *Cell* **110**,  
644 673–687
- 645 16. Ripoche, J., Day, A. J., Harris, T. J., and Sim, R. B. (1988) The complete amino acid  
646 sequence of human complement factor H. *Biochem. J.* **249**, 593–602
- 647 17. Fontaine, M., Demares, M. J., Koistinen, V., Day, a J., Davrinche, C., Sim, R. B., and  
648 Ripoche, J. (1989) Truncated forms of human complement factor H. *Biochem. J.* **258**,  
649 927–930
- 650 18. Clark, S. J., Schmidt, C. Q., White, A. M., Hakobyan, S., Morgan, B. P., and Bishop,  
651 P. N. (2014) Identification of Factor H-like Protein 1 as the Predominant Complement  
652 Regulator in Bruch's Membrane: Implications for Age-Related Macular Degeneration.  
653 *J. Immunol.* **193**, 4962–4970
- 654 19. Fritsche, L. G., Igl, W., Bailey, J. N. C., Grassmann, F., Sengupta, S., Bragg-Gresham,  
655 J. L., Burdon, K. P., Hebbbring, S. J., Wen, C., Gorski, M., Kim, I. K., Cho, D., Zack,  
656 D., Souied, E., Scholl, H. P. N., Bala, E., Lee, K. E., Hunter, D. J., Sardell, R. J.,  
657 Mitchell, P., Merriam, J. E., Cipriani, V., Hoffman, J. D., Schick, T., Lechanteur, Y. T.  
658 E., Guymer, R. H., Johnson, M. P., Jiang, Y., Stanton, C. M., Buitendijk, G. H. S.,  
659 Zhan, X., Kwong, A. M., Boleda, A., Brooks, M., Gieser, L., Ratnapriya, R., Branham,  
660 K. E., Foerster, J. R., Heckenlively, J. R., Othman, M. I., Vote, B. J., Liang, H. H.,  
661 Souzeau, E., McAllister, I. L., Isaacs, T., Hall, J., Lake, S., Mackey, D. A., Constable,  
662 I. J., Craig, J. E., Kitchner, T. E., Yang, Z., Su, Z., Luo, H., Chen, D., Ouyang, H.,  
663 Flagg, K., Lin, D., Mao, G., Ferreyra, H., Stark, K., von Strachwitz, C. N., Wolf, A.,  
664 Brandl, C., Rudolph, G., Olden, M., Morrison, M. A., Morgan, D. J., Schu, M., Ahn,  
665 J., Silvestri, G., Tsironi, E. E., Park, K. H., Farrer, L. A., Orlin, A., Brucker, A., Li, M.,  
666 Curcio, C. A., Mohand-Saïd, S., Sahel, J.-A., Audo, I., Benchaboune, M., Cree, A. J.,  
667 Rennie, C. A., Goverdhan, S. V., Grunin, M., Hagbi-Levi, S., Campochiaro, P.,  
668 Katsanis, N., Holz, F. G., Blond, F., Blanché, H., Deleuze, J.-F., Igo, R. P., Truitt, B.,  
669 Peachey, N. S., Meuer, S. M., Myers, C. E., Moore, E. L., Klein, R., Hauser, M. A.,  
670 Postel, E. A., Courtenay, M. D., Schwartz, S. G., Kovach, J. L., Scott, W. K., Liew, G.,

- 671 Tan, A. G., Gopinath, B., Merriam, J. C., Smith, R. T., Khan, J. C., Shahid, H., Moore,  
672 A. T., McGrath, J. A., Laux, R., Brantley, M. A., Agarwal, A., Ersoy, L., Caramoy, A.,  
673 Langmann, T., Saksens, N. T. M., de Jong, E. K., Hoyng, C. B., Cain, M. S.,  
674 Richardson, A. J., Martin, T. M., Blangero, J., Weeks, D. E., Dhillon, B., van Duijn, C.  
675 M., Doheny, K. F., Romm, J., Klaver, C. C. W., Hayward, C., Gorin, M. B., Klein, M.  
676 L., Baird, P. N., den Hollander, A. I., Fauser, S., Yates, J. R. W., Allikmets, R., Wang,  
677 J. J., Schaumberg, D. A., Klein, B. E. K., Hagstrom, S. A., Chowers, I., Lotery, A. J.,  
678 Léveillard, T., Zhang, K., Brilliant, M. H., Hewitt, A. W., Swaroop, A., Chew, E. Y.,  
679 Pericak-Vance, M. A., DeAngelis, M., Stambolian, D., Haines, J. L., Iyengar, S. K.,  
680 Weber, B. H. F., Abecasis, G. R., and Heid, I. M. (2016) A large genome-wide  
681 association study of age-related macular degeneration highlights contributions of rare  
682 and common variants. *Nat. Genet.* **48**, 134–143
- 683 20. Black, J. R. M. and Clark, S. J. (2016) Age-related macular degeneration: genome-  
684 wide association studies to translation. *Genet. Med.* **18**, 283–289
- 685 21. Schramm, E. C., Clark, S. J., Triebwasser, M. P., Raychaudhuri, S., Seddon, J. M., and  
686 Atkinson, J. P. (2014) Genetic variants in the complement system predisposing to age-  
687 related macular degeneration: A review. *Mol. Immunol.* **61**, 118–125
- 688 22. Taylor, R. L., Poulter, J. A., Downes, S. M., McKibbin, M., Khan, K. N., Inglehearn,  
689 C. F., Webster, A. R., Hardcastle, A. J., Michaelides, M., Bishop, P. N., Clark, S. J.,  
690 Black, G. C., Black, G., Hall, G., Ingram, S., Taylor, R., Manson, F., Sergouniotis, P.,  
691 Webster, A., Hardcastle, A., Plagnol, V., Pontikos, N., Cheetham, M., Arno, G.,  
692 Fiorentino, A., Inglehearn, C., Toomes, C., Ali, M., Smith, C., Khan, K., Downes, S.,  
693 Yu, J., Halford, S., Broadgate, S., and van Heyningen, V. (2019) Loss-of-Function  
694 Mutations in the CFH Gene Affecting Alternatively Encoded Factor H-like 1 Protein  
695 Cause Dominant Early-Onset Macular Drusen. *Ophthalmology* **126**, 1410–1421
- 696 23. Cipriani, V., Lorés-Motta, L., He, F., Fathalla, D., Tilakaratna, V., McHarg, S.,  
697 Bayatti, N., Acar, İ. E., Hoyng, C. B., Fauser, S., Moore, A. T., Yates, J. R. W., de  
698 Jong, E. K., Morgan, B. P., den Hollander, A. I., Bishop, P. N., and Clark, S. J. (2020)  
699 Increased circulating levels of Factor H-Related Protein 4 are strongly associated with  
700 age-related macular degeneration. *Nat. Commun.* **11**, 778
- 701 24. Fisher, C. R. and Ferrington, D. A. (2018) Perspective on AMD pathobiology: A  
702 bioenergetic crisis in the RPE. *Investig. Ophthalmol. Vis. Sci.* **59**, AMD41–AMD47
- 703 25. Sivapathasuntharam, C., Hayes, M. J., Shihmar, H., Kam, J. H., Sivaprasad, S., and  
704 Jeffery, G. (2019) Complement factor H regulates retinal development and its absence



- 705 may establish a footprint for age related macular degeneration. *Sci. Rep.* **9**, 1082
- 706 26. Landowski, M., Kelly, U., Klingeborn, M., Groelle, M., Ding, J. D., Grigsby, D., and  
707 Rickman, C. B. (2019) Human complement factor H Y402H polymorphism causes an  
708 age-related macular degeneration phenotype and lipoprotein dysregulation in mice.  
709 *Proc. Natl. Acad. Sci. U. S. A.* **116**, 3703–3711
- 710 27. Hellwage, J., Kühn, S., and Zipfel, P. F. (1997) The human complement regulatory  
711 factor-H-like protein 1, which represents a truncated form of factor H, displays cell-  
712 attachment activity. *Biochem. J.* **326**, 321–327
- 713 28. Swinkels, M., Zhang, J. H., Tilakaranta, V., Black, G., Perveen, R., Mcharg, S., Day,  
714 A. J., and Clark, S. J. (2017) C-reactive protein and pentraxin-3 binding of factor H-  
715 like protein 1 differs from complement factro : implications for retinal inflammation.  
716 *Sci. Reports (submitted manuscript)* **8**, 1643
- 717 29. Bolger, A. M., Lohse, M., and Usadel, B. (2014) Trimmomatic: A flexible trimmer for  
718 Illumina sequence data. *Bioinformatics* **30**, 2114–2120
- 719 30. Dobin, A., Davis, C. A., Schlesinger, F., Drenkow, J., Zaleski, C., Jha, S., Batut, P.,  
720 Chaisson, M., and Gingeras, T. R. (2013) STAR: Ultrafast universal RNA-seq aligner.  
721 *Bioinformatics* **29**, 15–21
- 722 31. Love, M. I., Huber, W., and Anders, S. (2014) Moderated estimation of fold change  
723 and dispersion for RNA-seq data with DESeq2. *Genome Biol.* **15**, 550
- 724 32. Cai, J., Nelson, K. C., Wu, M., Sternberg, P., and Jones, D. P. (2000) Oxidative  
725 damage and protection of the RPE. *Prog. Retin. Eye Res.* **19**, 205–221
- 726 33. Plafker, S. M., O’Mealey, G. B., and Szweda, L. I. (2012) Mechanisms for Countering  
727 Oxidative Stress and Damage in Retinal Pigment Epithelium. In *International Review*  
728 *of Cell and Molecular Biology* vol. 298, pp. 135–177,
- 729 34. Ji Cho, M., Yoon, S. J., Kim, W., Park, J., Lee, J., Park, J. G., Cho, Y. L., Hun Kim, J.,  
730 Jang, H., Park, Y. J., Lee, S. H., and Min, J. K. (2019) Oxidative stress-mediated  
731 TXNIP loss causes RPE dysfunction. *Exp. Mol. Med.* **51**, 1–13
- 732 35. Afshari, F. T. and Fawcett, J. W. (2009) Improving RPE adhesion to Bruch’s  
733 membrane.
- 734 36. Roggia, M. F. and Ueta, T. (2015)  $\alpha\beta 5$  Integrin/FAK/PGC-1 $\alpha$  pathway confers  
735 protective effects on retinal pigment epithelium. *PLoS One* **10**, e0134870
- 736 37. Yu, C., Muñoz, L. E., Mallavarapu, M., Herrmann, M., and Finnemann, S. C. (2019)  
737 Annexin A5 regulates surface  $\alpha\beta 5$  integrin for retinal clearance phagocytosis. *J. Cell*  
738 *Sci.* **132**

- 739 38. Whitmore, S. S., Sohn, E. H., Chirco, K. R., Drack, A. V., Stone, E. M., Tucker, B. A.,  
740 and Mullins, R. F. (2015) Complement activation and choriocapillaris loss in early  
741 AMD: Implications for pathophysiology and therapy. *Prog. Retin. Eye Res.* **45**, 1–29
- 742 39. Forest, D. L., Johnson, L. V., and Clegg, D. O. (2015) Cellular models and therapies  
743 for age-related macular degeneration. *DMM Dis. Model. Mech.* **8**, 421–427
- 744 40. Chirco, K. R., Whitmore, S. S., Wang, K., Potempa, L. A., Halder, J. A., Stone, E. M.,  
745 Tucker, B. A., and Mullins, R. F. (2016) Monomeric C-reactive protein and  
746 inflammation in age-related macular degeneration. *J. Pathol.* **240**, 173–183
- 747 41. Clark, S. J. and Bishop, P. N. (2017) The eye as a complement dysregulation hotspot.  
748 *Semin. Immunopathol.* **40**, 65–74
- 749 42. Keenan, T. D. L., Toso, M., Pappas, C., Nichols, L., Bishop, P. N., and Hageman, G.  
750 S. (2015) Assessment of proteins associated with complement activation and  
751 inflammation in maculae of human donors homozygous risk at chromosome 1 CFH-to-  
752 F13B. *Investig. Ophthalmol. Vis. Sci.* **56**, 4870–4879
- 753 43. Clark, S. J., Higman, V. A., Mulloy, B., Perkins, S. J., Lea, S. M., Sim, R. B., and Day,  
754 A. J. (2006) His-384 allotypic variant of factor H associated with age-related macular  
755 degeneration has different heparin binding properties from the non-disease-associated  
756 form. *J. Biol. Chem.* **281**, 24713–24720
- 757 44. Clark, S. J., Perveen, R., Hakobyan, S., Morgan, B. P., Sim, R. B., Bishop, P. N., and  
758 Day, A. J. (2010) Impaired binding of the age-related macular degeneration-associated  
759 complement factor H 402H allotype to Bruch’s membrane in human retina. *J. Biol.*  
760 *Chem.* **285**, 30192–30202
- 761 45. Langford-Smith, A., Day, A. J., Bishop, P. N., and Clark, S. J. (2015) Complementing  
762 the sugar code: Role of GAGs and sialic acid in complement regulation. *Front.*  
763 *Immunol.* **6**
- 764 46. Clark, S. J., Ridge, L. A., Herbert, A. P., Hakobyan, S., Mulloy, B., Lennon, R.,  
765 Würzner, R., Morgan, B. P., Uhrín, D., Bishop, P. N., and Day, A. J. (2013) Tissue-  
766 specific host recognition by complement factor H is mediated by differential activities  
767 of its glycosaminoglycan-binding regions. *J. Immunol.* **190**, 2049–2057
- 768 47. Keenan, T. D. L., Pickford, C. E., Holley, R. J., Clark, S. J., Lin, W., Dowsey, A. W.,  
769 Merry, C. L., Day, A. J., and Bishop, P. N. (2014) Age-dependent changes in heparan  
770 sulfate in human Bruch’s membrane: Implications for age-related macular  
771 degeneration. *Investig. Ophthalmol. Vis. Sci.* **55**, 5370–5379
- 772 48. Lee, S. H., Lee, J. H., Lee, H. Y., and Min, K. J. (2019) Sirtuin signaling in cellular

- 773 senescence and aging. *BMB Rep.* **52**, 24–34
- 774 49. Ferrington, D. A., Kapphahn, R. J., Leary, M. M., Atilano, S. R., Terluk, M. R.,  
775 Karunadharma, P., Chen, G. K. J., Ratnapriya, R., Swaroop, A., Montezuma, S. R.,  
776 and Kenney, M. C. (2016) Increased retinal mtDNA damage in the CFH variant  
777 associated with age-related macular degeneration. *Exp. Eye Res.* **145**, 269–277
- 778 50. Sinha, D., Valapala, M., Shang, P., Hose, S., Grebe, R., Luty, G. A., Zigler, J. S.,  
779 Kaarniranta, K., and Handa, J. T. (2016) Lysosomes: Regulators of autophagy in the  
780 retinal pigmented epithelium. *Exp. Eye Res.* **144**, 46–53
- 781 51. Loboda, A., Damulewicz, M., Pyza, E., Jozkowicz, A., and Dulak, J. (2016) Role of  
782 Nrf2/HO-1 system in development, oxidative stress response and diseases: an  
783 evolutionarily conserved mechanism. *Cell. Mol. Life Sci.* **73**, 3221–3247
- 784 52. Zhao, Z., Chen, Y., Wang, J., Sternberg, P., Freeman, M. L., Grossniklaus, H. E., and  
785 Cai, J. (2011) Age-related retinopathy in NRF2-deficient mice. *PLoS One* **6**, e19456
- 786 53. Tababat-Khani, P., Berglund, L. M., Agardh, C. D., Gomez, M. F., and Agardh, E.  
787 (2013) Photocoagulation of Human Retinal Pigment Epithelial Cells In Vitro:  
788 Evaluation of Necrosis, Apoptosis, Cell Migration, Cell Proliferation and Expression  
789 of Tissue Repairing and Cytoprotective Genes. *PLoS One* **8**, e70465
- 790 54. Noonan, E. J., Place, R. F., Giardina, C., and Hightower, L. E. (2007) Hsp70B'  
791 regulation and function. *Cell Stress Chaperones* **12**, 393–402
- 792 55. Deane, C. A. S. and Brown, I. R. (2018) Intracellular Targeting of Heat Shock Proteins  
793 in Differentiated Human Neuronal Cells Following Proteotoxic Stress. *J. Alzheimer's*  
794 *Dis.* **66**, 1295–1308
- 795 56. Bruner, K. L., Derfoul, A., Robertson, N. M., Guerriero, G., Fernandes-Alnemri, T.,  
796 Alnemri, E. S., and Litwack, G. (1997) The unliganded mineralocorticoid receptor is  
797 associated with heat shock proteins 70 and 90 and the immunophilin FKBP-52.  
798 *Recept. Signal Transduct.* **7**, 85–98
- 799 57. M. Briones, A. and M. Touyz, R. (2019) Aldosterone/MR Signaling, Oxidative Stress,  
800 and Vascular Dysfunction. In *Aldosterone-Mineralocorticoid Receptor - Cell Biology*  
801 *to Translational Medicine* IntechOpen
- 802 58. Zhao, M., Mantel, I., Gelize, E., Li, X., Xie, X., Arboleda, A., Seminel, M., Levy-  
803 Boukris, R., Dernigoghossian, M., Prunotto, A., Andrieu-Soler, C., Rivolta, C.,  
804 Canonica, J., Naud, M. C., Lechner, S., Farman, N., Bravo-Osuna, I., Herrero-Vanrell,  
805 R., Jaisser, F., and Behar-Cohen, F. (2019) Mineralocorticoid receptor antagonism  
806 limits experimental choroidal neovascularization and structural changes associated

807 with neovascular age-related macular degeneration. *Nat. Commun.* **10**, 369  
808 59. Borrás, C., Canonica, J., Jorieux, S., Abache, T., El Sanharawi, M., Klein, C.,  
809 Delaunay, K., Jonet, L., Salvodelli, M., Naud, M.-C., Arsenijevic, Y., Shalabi, A.,  
810 Souchaud, L., Behar-Cohen, F., and Dinét, V. (2019) CFH exerts anti-oxidant effects  
811 on retinal pigment epithelial cells independently from protecting against membrane  
812 attack complex. *Sci. Rep.* **9**, 13873  
813

814 **Figure legends**

815

816 **Figure 1. Schematic of RPE cell interactions with their underlying ECM.** a) The RPE  
817 forms a monolayer on Bruch's membrane and plays a crucial role in maintaining  
818 photoreceptors. Bruch's membrane separates the RPE its blood supply, the choriocapillaris.  
819 RPE cells adhere to, and interact with, ligands within the basement membrane of Bruch's  
820 membrane (BrM), including FN and LA, through various integrin heterodimer receptors  
821 expressed on their surface. Bruch's membrane comprises five separate layers: the RPE  
822 basement membrane; the inner collagenous layer; an elastin core; the outer collagenous layer;  
823 and the endothelial basement membrane layer. The complement regulator FHL-1 is found  
824 anchored to heparan sulphate and dermatan sulphate glycosaminoglycan (GAG) chains found  
825 in collagenous and basement membrane layers of Bruch's membrane. b) Both FH and its  
826 truncated variant FHL-1 are comprised of complement control protein (CCP) domains: FH has  
827 twenty domains, while FHL-1 has seven CCPs identical to FH but with a unique C-terminal  
828 tail. Both proteins also share an RGD integrin-binding motif in CCP4.

829

830

831 **Figure 2. Primary RPE cells interact with immobilised FHL-1.** Cultured primary RPE cells  
832 collected from human donor eyes were incubated for three hours in wells of 96 well plates  
833 coated with: a) FN; b) FHL-1; c) FH; d) BSA; or e) FHR-4. f) the number of spread cells were  
834 counted in four different visual fields for each condition and each condition was measured in  
835 triplicate. The percentage of spread cells were calculated and compared to the positive control,  
836 fibronectin. Scale bar represents 100µm. Images in a-e are representative of 10 independent  
837 experiments. Data in f represent  $n=10 \pm \text{s.e.m.}$

838

839

840 **Figure 3. RPE cell interactions with FHL-1 are mediated through the  $\alpha 5\beta 1$  integrin.**  
841 Cultured primary RPE cells were incubated on an FHL-1 matrix (a) in the presence of  
842 competing antibodies against specific integrin subunits (all 10µg/ml), including: b) anti- $\alpha 5$ ; c)  
843 anti- $\beta 1$ ; d) anti- $\alpha V$ ; e) anti- $\alpha V\beta 3$ ; and f) anti- $\alpha V\beta 5$ . g) The percentage of cell spreading on  
844 FHL-1 in the presence of each inhibiting antibody was calculated. The inhibitory effects of  
845 both anti- $\beta 1$  and anti- $\alpha 5$  on primary RPE cell spreading on FHL-1 were shown to be dose  
846 dependent in (h) and (i) respectively. Images in a-f are representative of 3 independent  
847 experiments. Data in g represent  $n=3 \pm \text{s.e.m.}$  Statistical analysis was performed by Student T

848 test, where  $*=P<0.05$  and  $****=P<0.0001$ . Data in **h-i** are  $n=3 \pm$  s.e.m. Scale bar represents  
849  $100\mu\text{m}$ .

850

851

852 **Figure 4. RPE cell  $\alpha 5\beta 1$  integrin recognises the RGD binding motif in FHL-1.** **a)**  
853 Schematic showing the design of both the RGD cyclic peptide and the scrambled peptide  
854 control, as well as the location of the aspartic acid mutation to an alanine residue for the  
855 creation of the RGD null FHL-1 protein. **b)** The spreading of primary RPE cells to immobilised  
856 FHL-1 was inhibited with increasing concentrations of the cyclic RGD peptide: no inhibition  
857 was observed under the same conditions with the control scrambled peptide. Data comprises  
858  $n=3 \pm$  s.e.m. The binding of the  $\alpha 5\beta 1$  integrin to the RGD binding domain in FHL-1 is tested  
859 by incubation of primary RPE cells with, **a)** fibronectin, **b)** FHL-1, **c)** FHL-1 RGD null, or **d)**  
860 BSA. **e)** Percentage of spread cells were calculated and compared to the positive control,  
861 fibronectin. Images in **a-d** are representative of 3 independent experiments. Data in **e** represent  
862  $n=3 \pm$  s.e.m. Scale bar represents  $100\mu\text{m}$ .

863

864

865 **Figure 5. hTERT-RPE1 cells mirror the FHL-1 binding of primary RPE cells.** The  
866 hTERT-RPE cell line was tested for FHL-1 binding by addition to different matrices for three  
867 hours, including **a)** FN; **b)** FHL-1; **c)** FHL-1 RGD null; and **d)** BSA. **e)** the number of spread  
868 cells were counted in four different visual fields for each condition and each condition were  
869 measured in triplicate. The percentage of spread cells was calculated and compared to the  
870 positive control, FN. Images in **a-d** are representative of 3 independent experiments. Data in **e**  
871 represent  $n=3 \pm$  s.e.m. Scale bar represents  $100\mu\text{m}$ .

872

873

874 **Figure 6. IPA analysis of differentially expressed genes in the most significantly altered**  
875 **canonical pathways.** Bar charts indicate the most significantly different canonical pathways  
876 and the number of differentially expressed genes for each substrate comparison. Blue indicates  
877 decreased expression; orange genes indicate increased expression according to each  
878 comparison (measured on the left axis) and the line indicates significance as  $-\log p$  value  
879 (measured on the right axis).

880

881

882 **Figure 7. FHL-1 and LA protect hTERT-RPE1 cells from oxidative stress-induced cell**  
883 **death. a)** UV Photographs of cells grown for 24h on FHL-1, FHL-1 RGD null, LA and FN  
884 coated plates subsequently stained with Hoechst 33342 after 24h in the presence or absence of  
885 H<sub>2</sub>O<sub>2</sub>. Scale bar equals 100µm. **b)** Bar chart quantifying this data demonstrates that FHL-1 and  
886 LA exert significant protective properties (p<0.01 and p<0.02, respectively) compared to FN  
887 and a partial, but non-significant protective effect with FHL-1 NULL (p>0.05)  
888

Figure 1

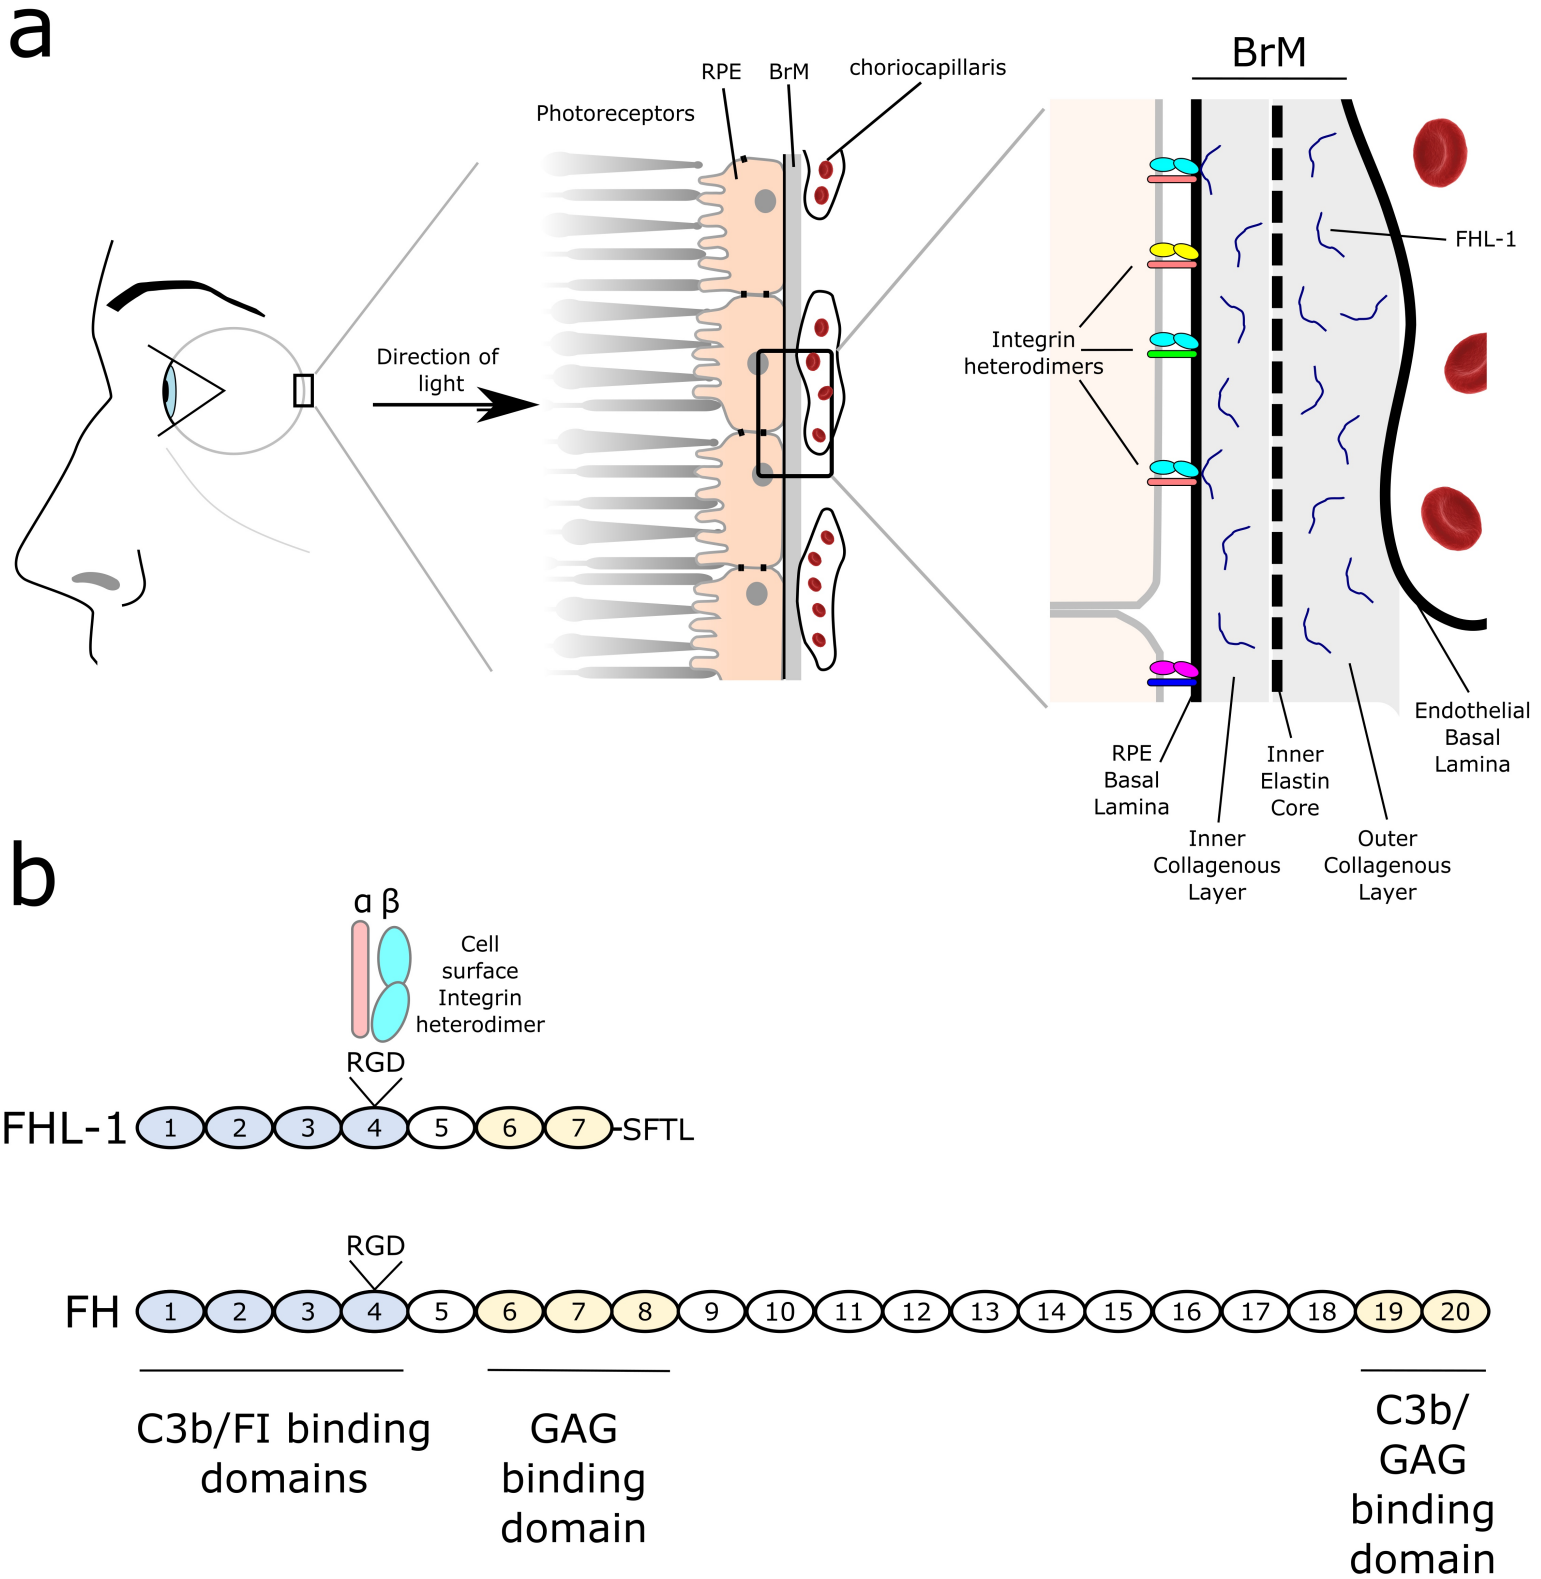



Figure 2

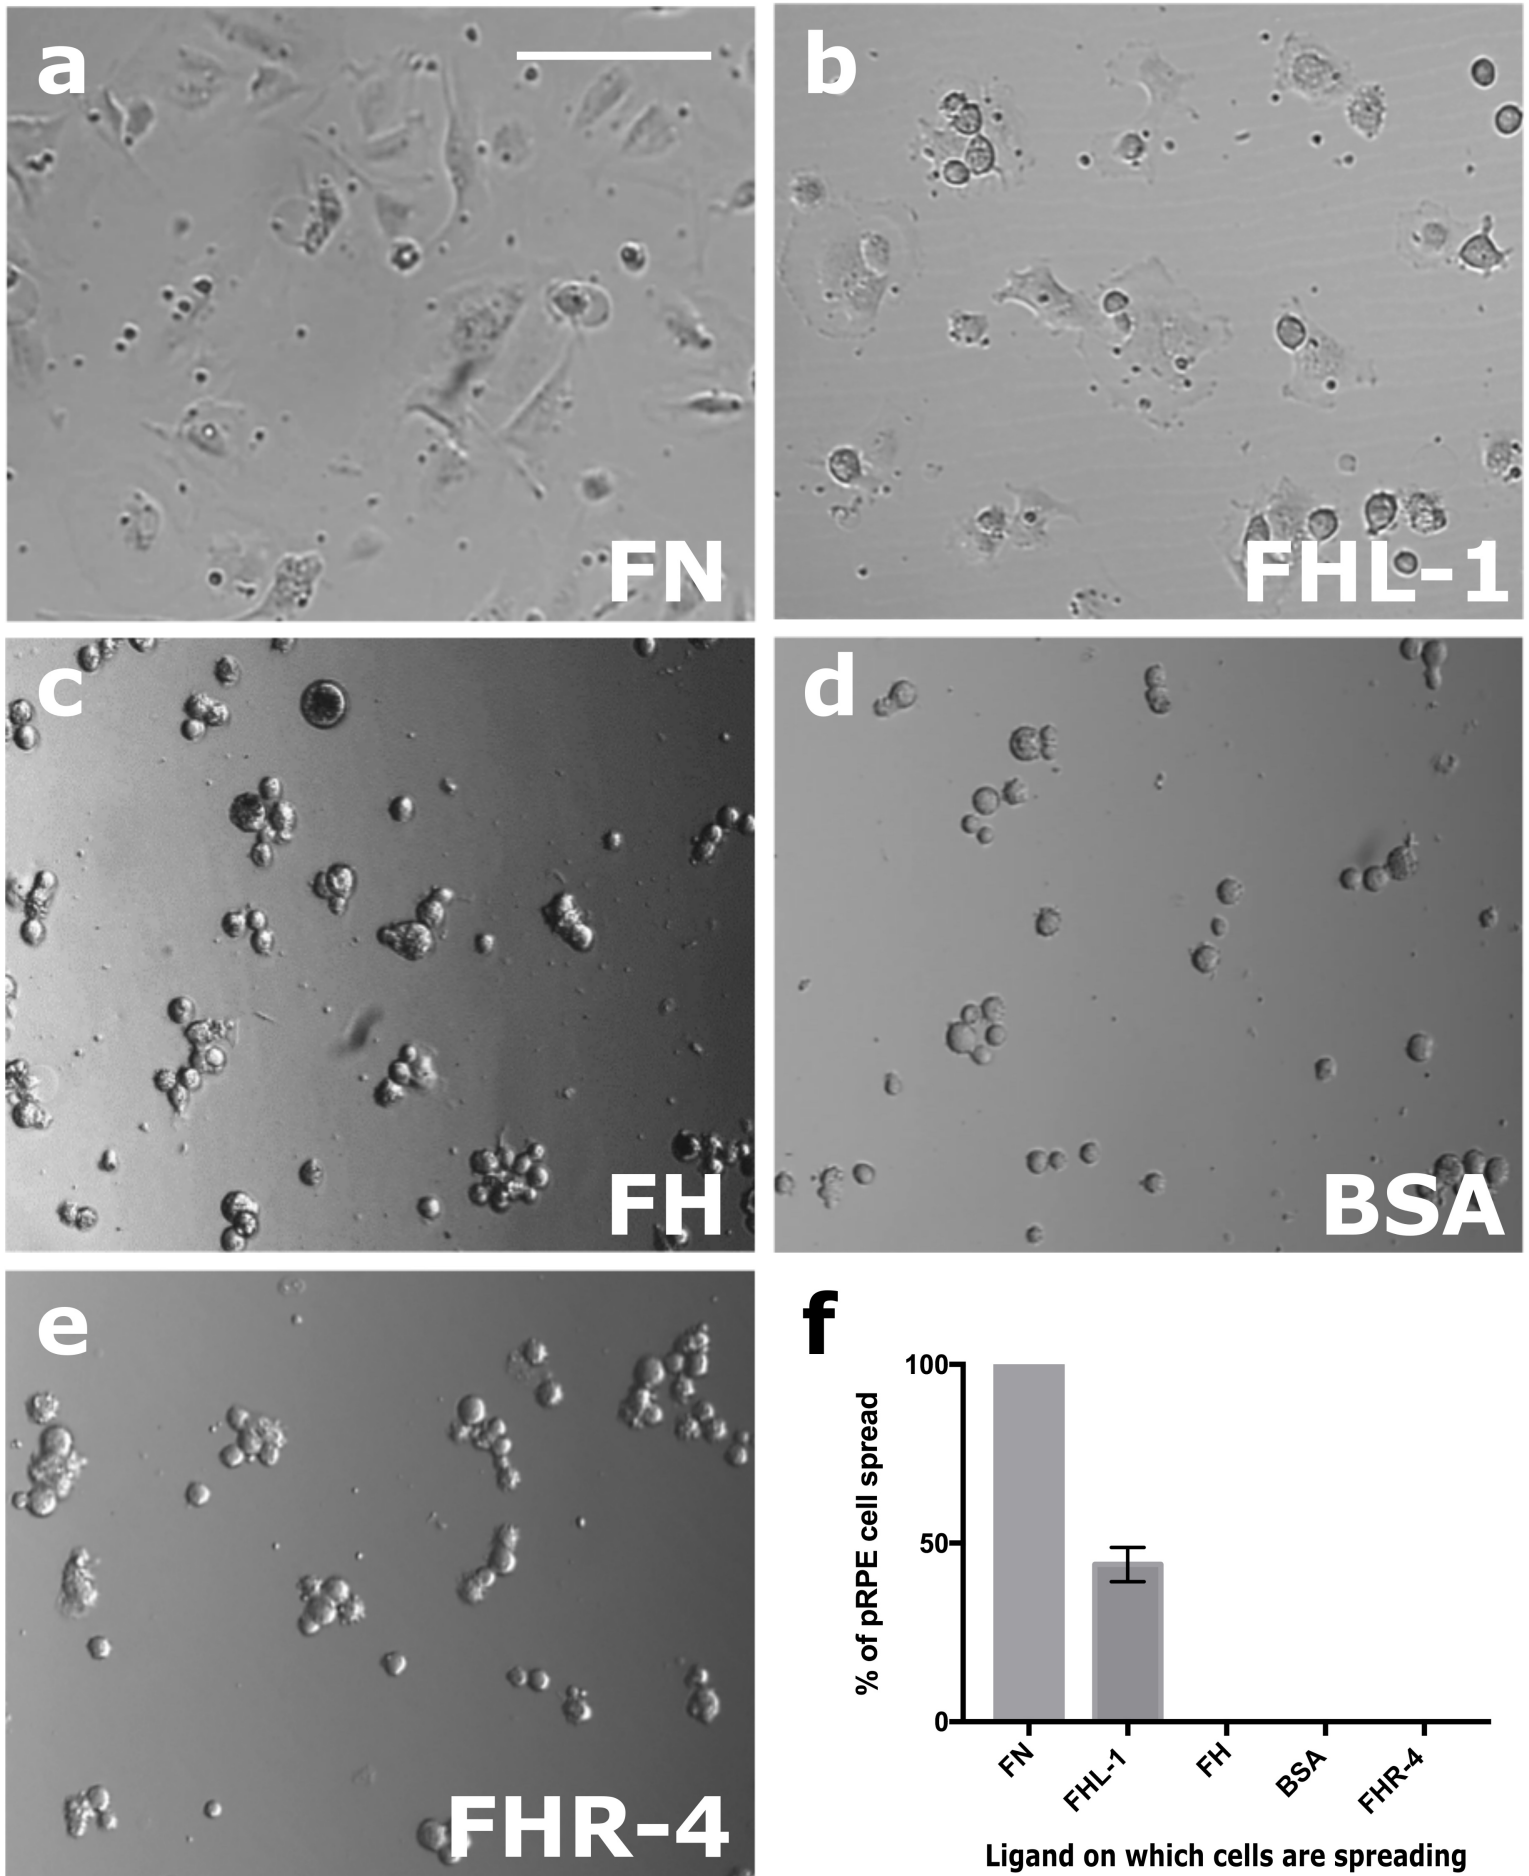

Figure 3

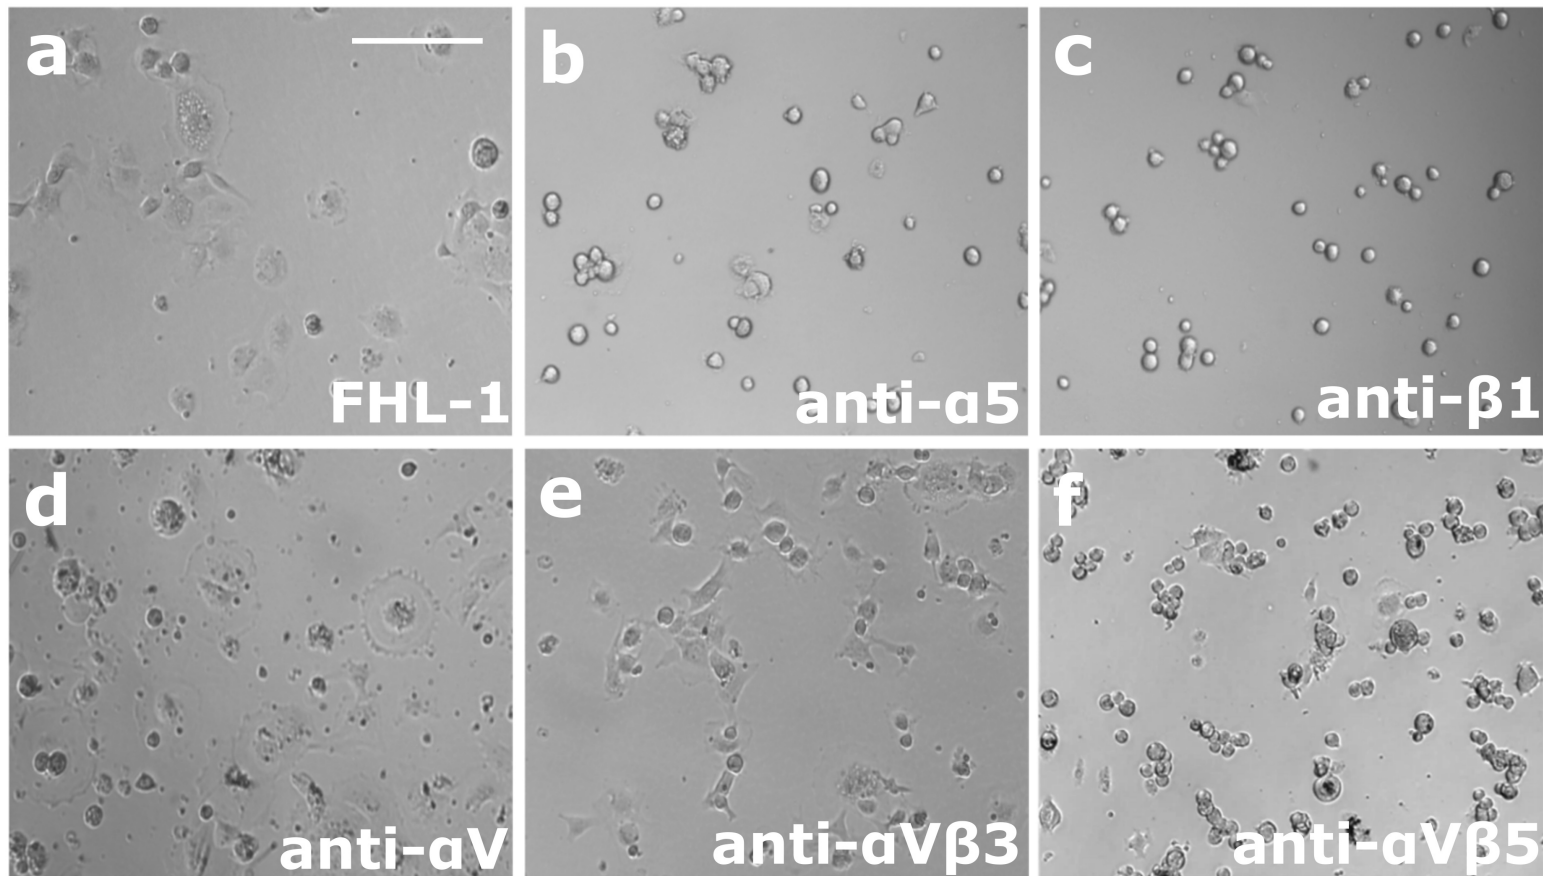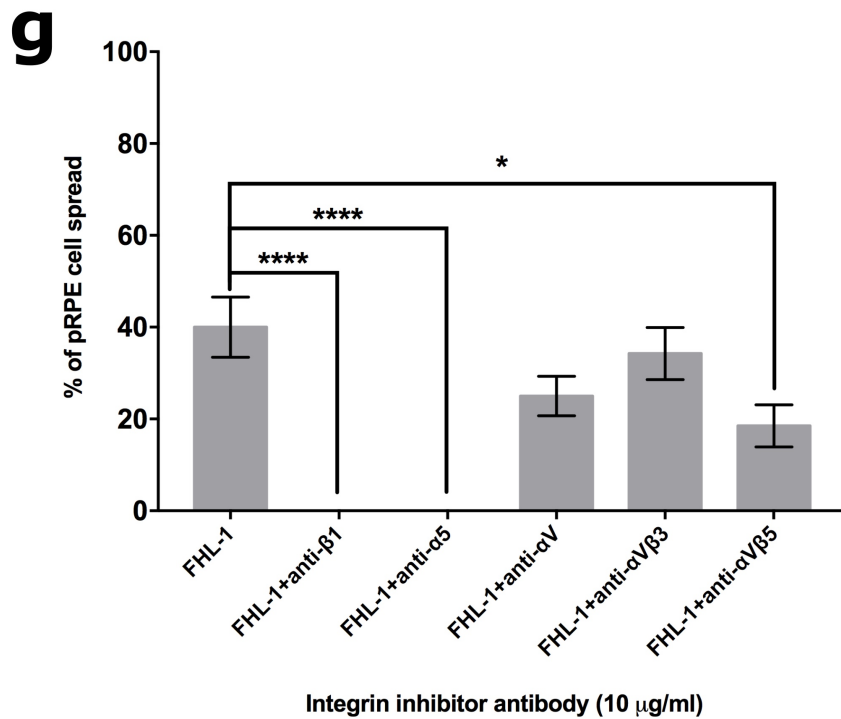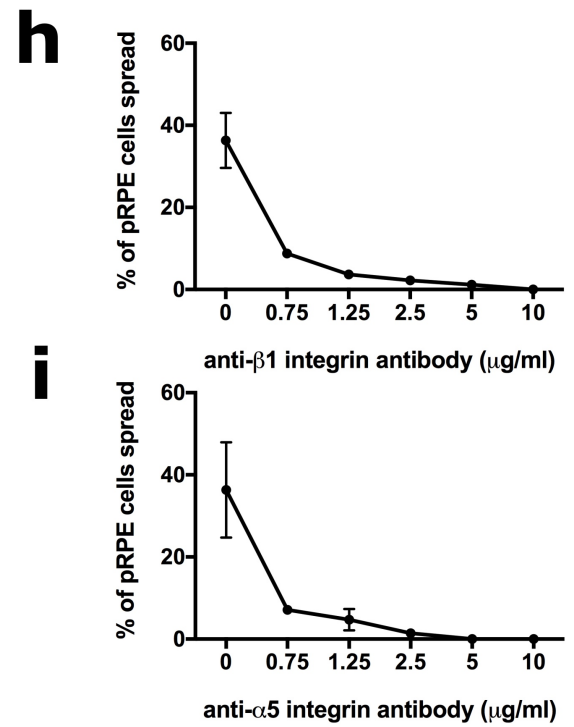

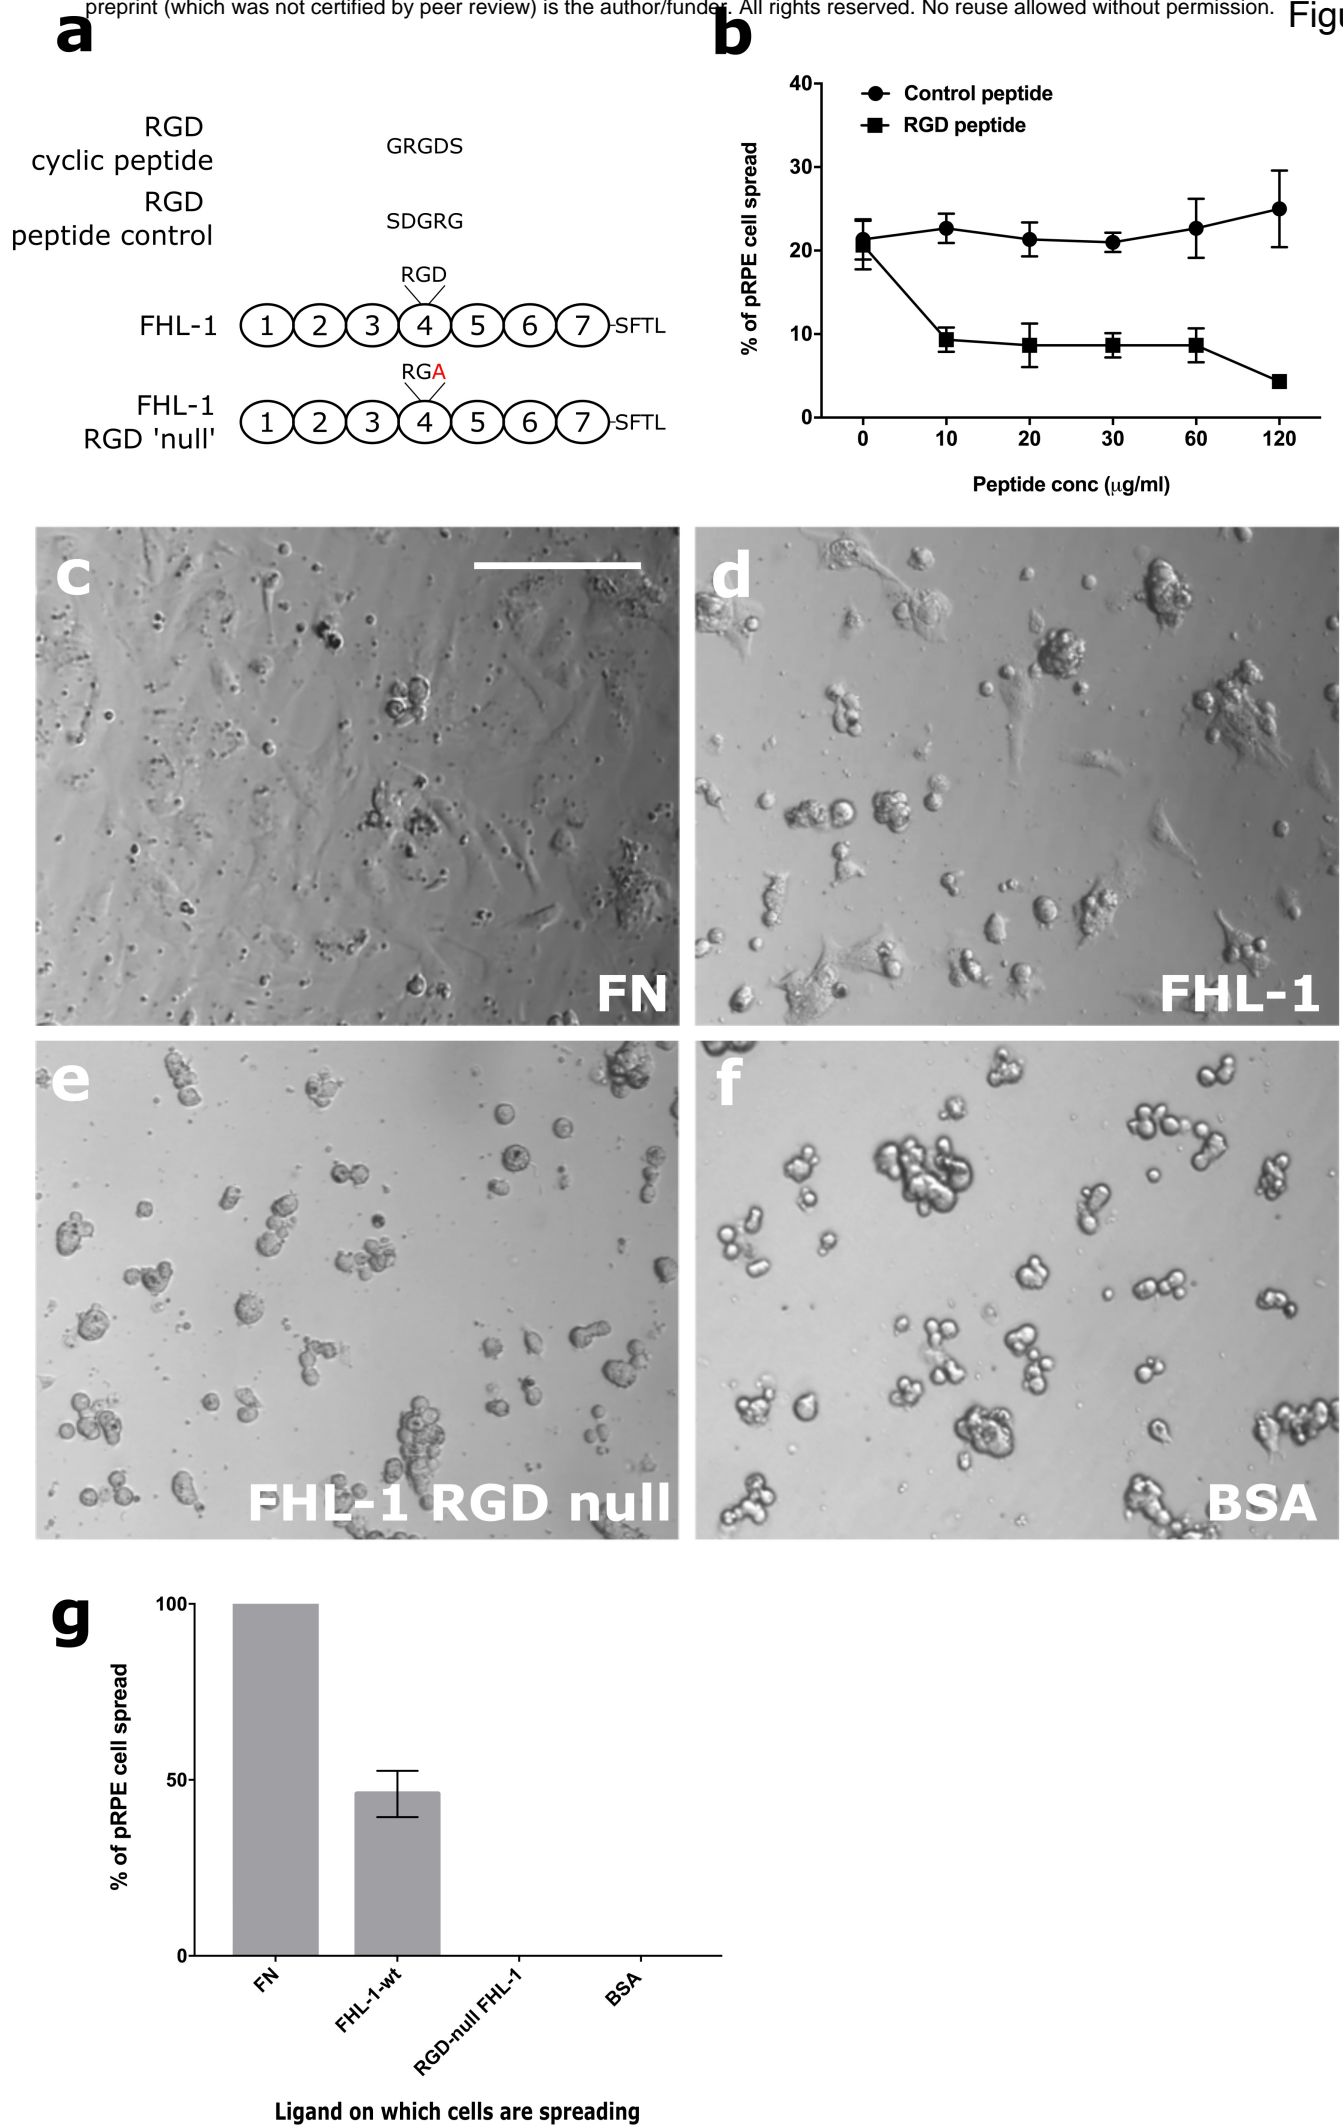

Figure 5

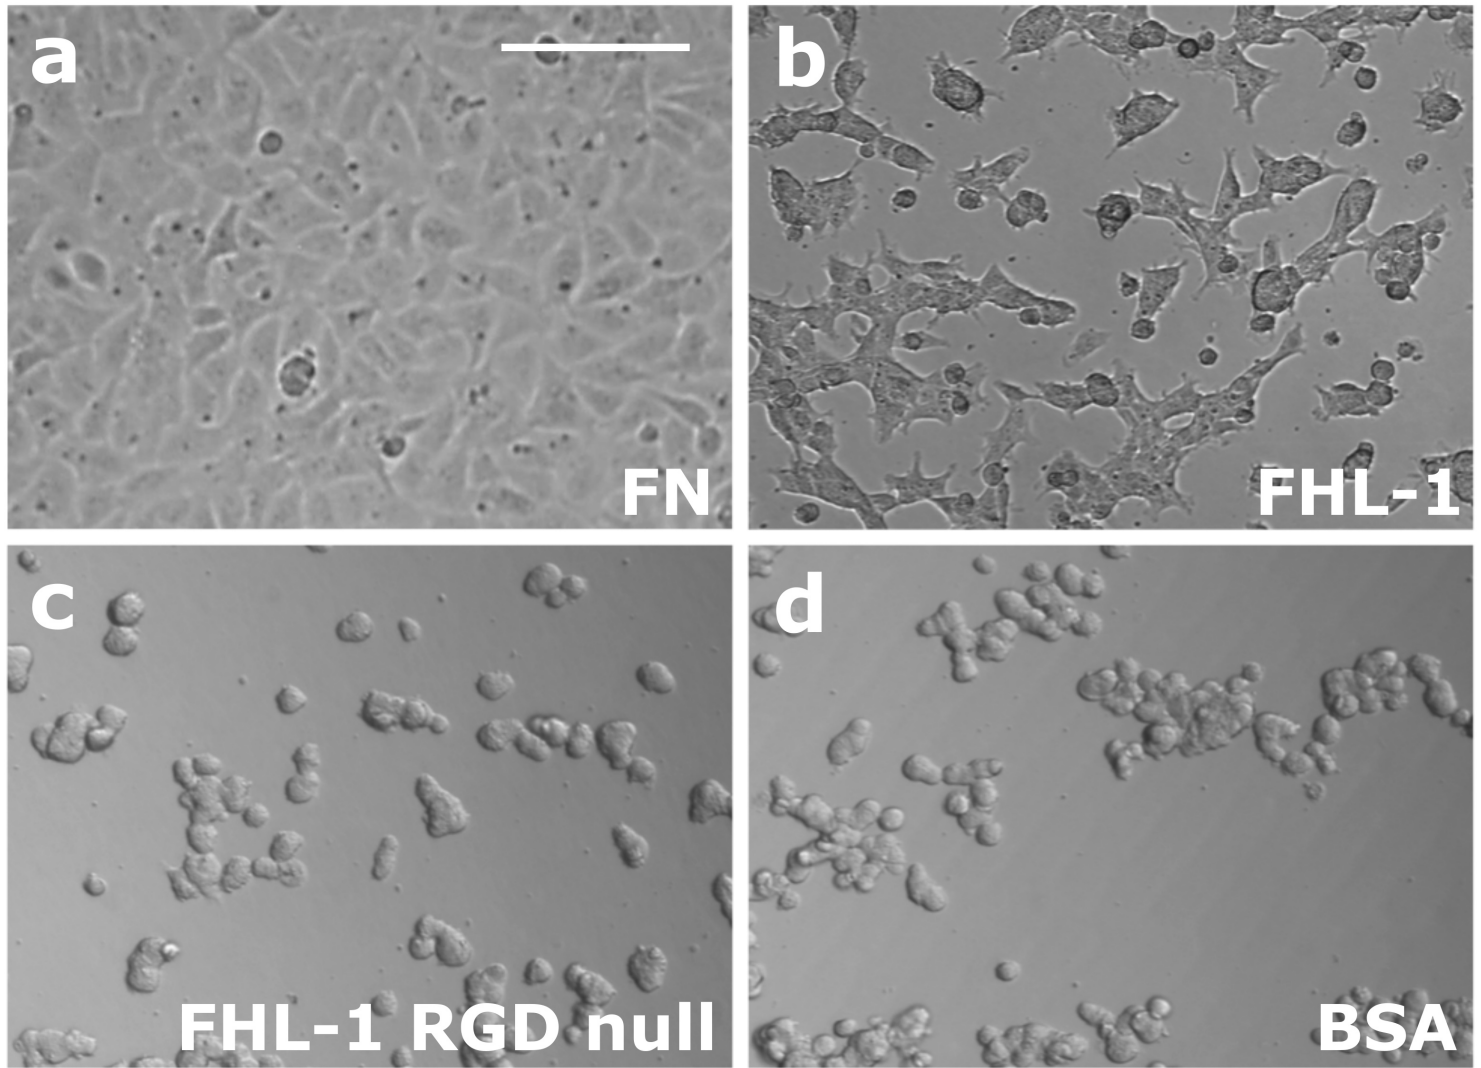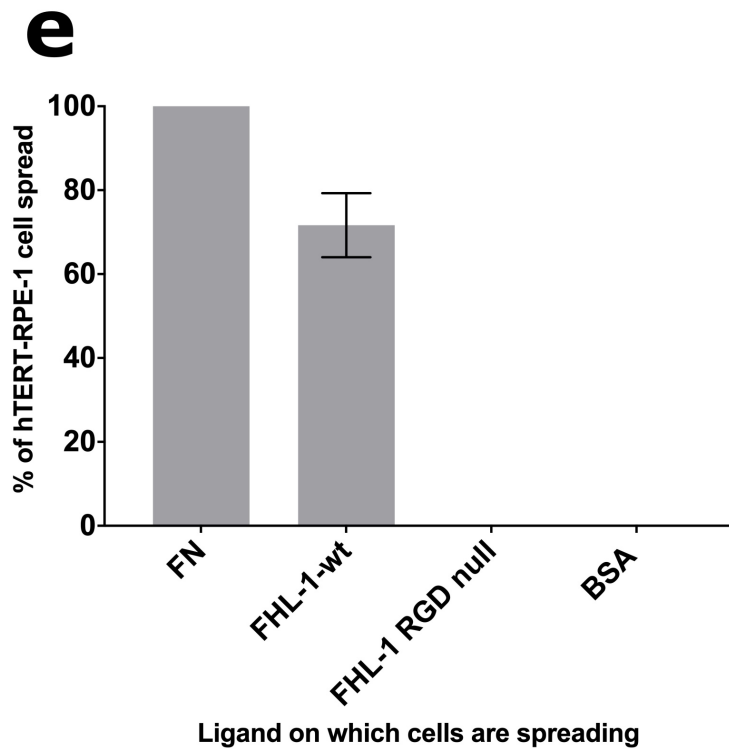

Figure 6

### FHL1 v FN

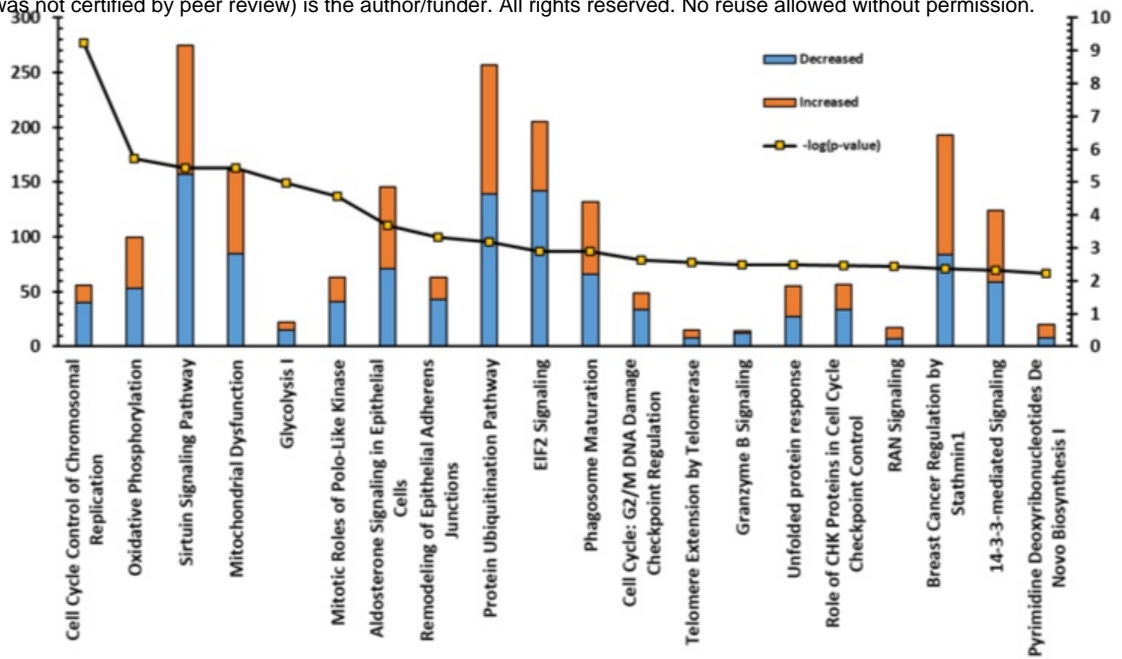

### FHL1 v LA

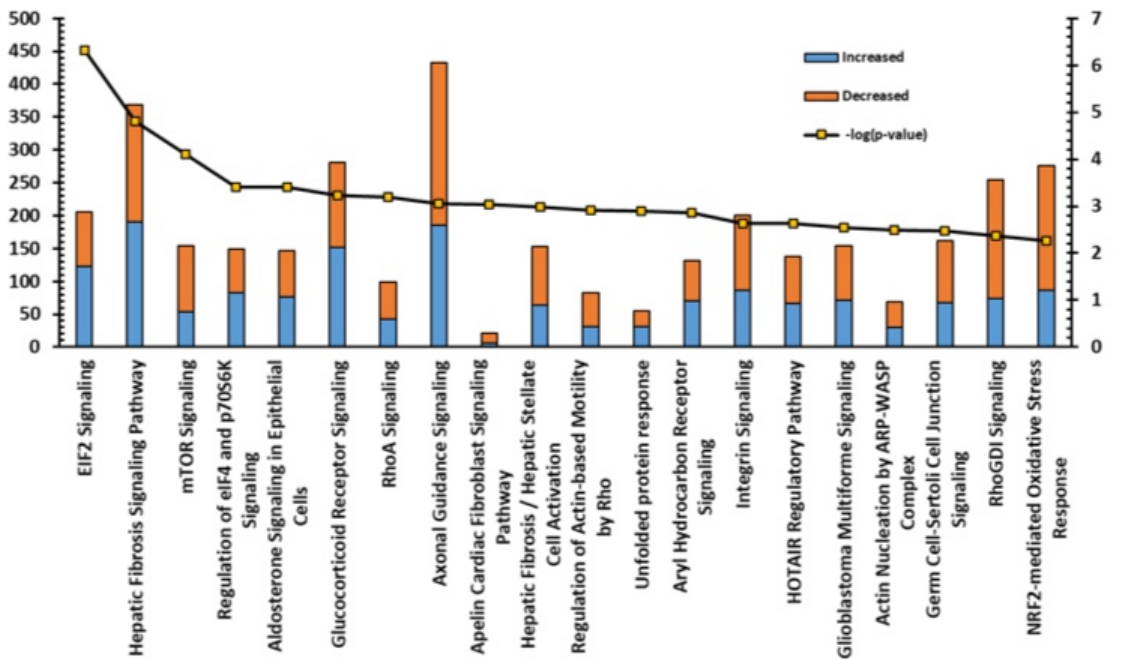

### LA v FN

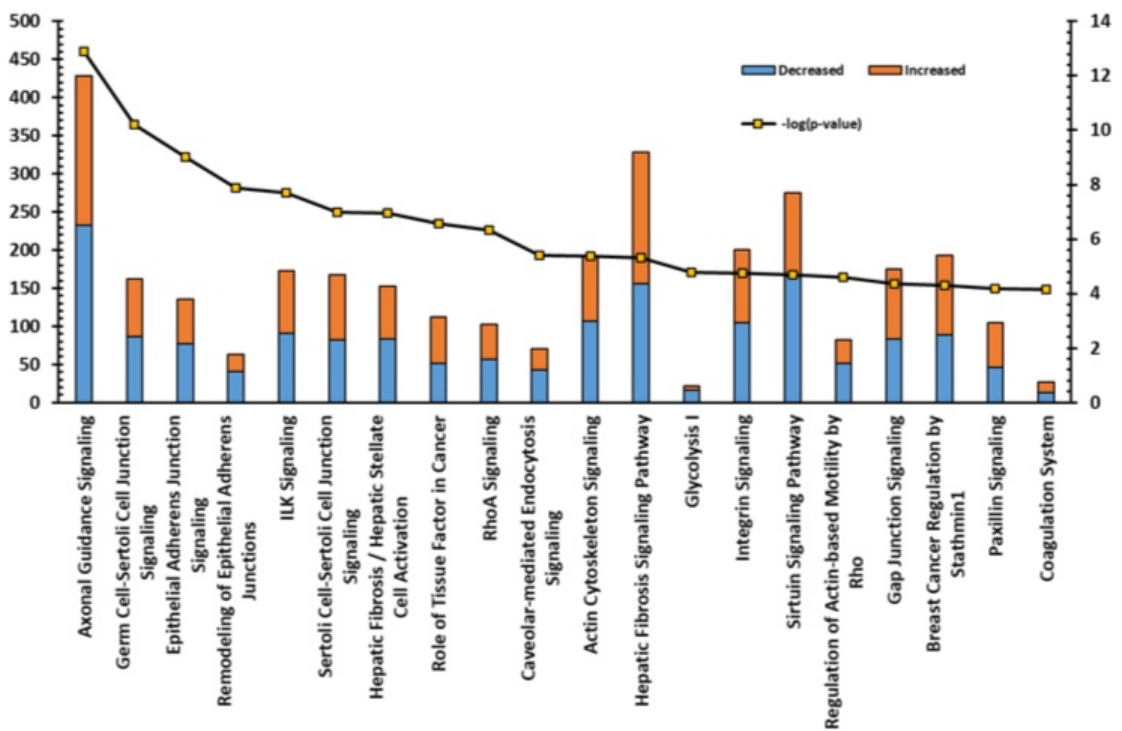

Figure 7

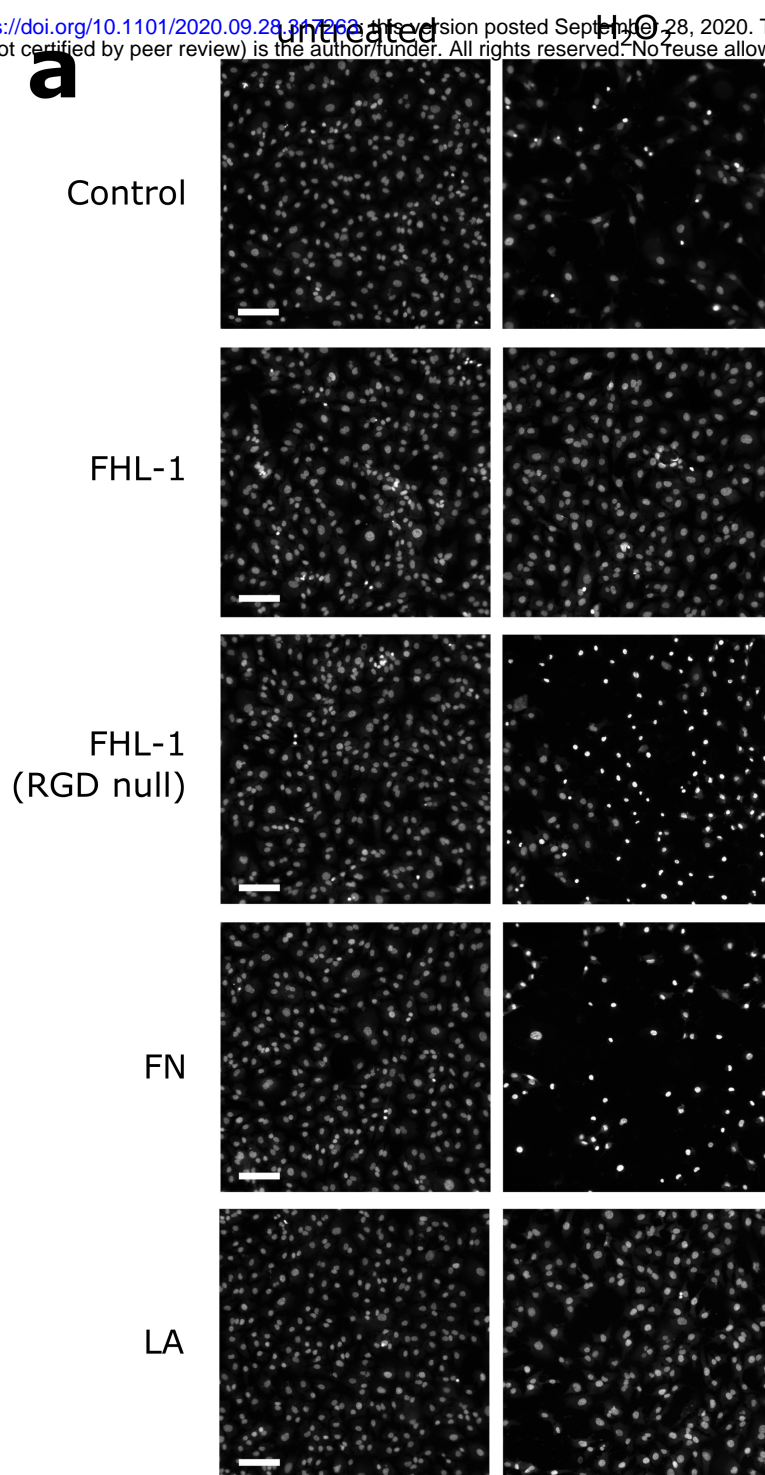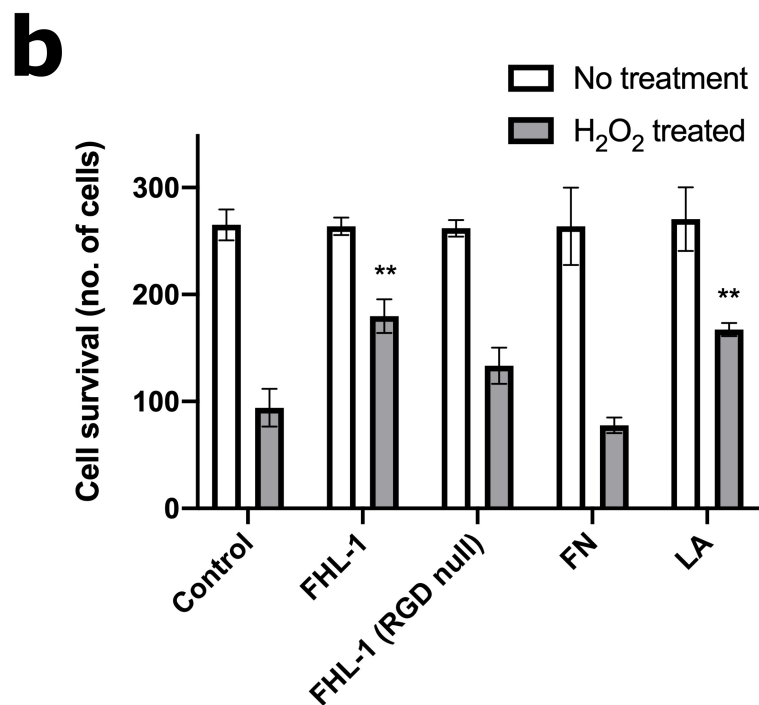

Source: http://biorxiv.org/content/10.1101/2020.09.28.317263v1.full.pdf
